# Supplementary material for: Rapid, application-based survey to characterise the impacts of COVID-19 on LGBTQ+ communities around the world: an observational study
Source: PubMed Central journal article supplement — BMJ Open. 2022 Apr 12;12(4):e041896. doi: 10.1136/bmjopen-2020-041896 (PMC9006192; doi:10.1136/bmjopen-2020-041896), 2022-04-12
Supplement: bmjopen-2020-041896.draft_revisions.pdf [file bmjopen-2020-041896.draft_revisions.pdf]

# BMJ Open

BMJ Open is committed to open peer review. As part of this commitment we make the peer review history of every article we publish publicly available.

When an article is published we post the peer reviewers' comments and the authors' responses online. We also post the versions of the paper that were used during peer review. These are the versions that the peer review comments apply to.

The versions of the paper that follow are the versions that were submitted during the peer review process. They are not the versions of record or the final published versions. They should not be cited or distributed as the published version of this manuscript.

BMJ Open is an open access journal and the full, final, typeset and author-corrected version of record of the manuscript is available on our site with no access controls, subscription charges or pay-per-view fees (<http://bmjopen.bmj.com>).

If you have any questions on BMJ Open's open peer review process please email [info.bmjopen@bmj.com](mailto:info.bmjopen@bmj.com)

# BMJ Open

## A Rapid, Application-Based Survey to Characterize the Impacts of COVID-19 on LGBTQ+ Communities Around the World: an observational study

|                               |                                                                                                                                                                                                                                                                                                                                                                                                                                                                                                                                                                                                                         |
|-------------------------------|-------------------------------------------------------------------------------------------------------------------------------------------------------------------------------------------------------------------------------------------------------------------------------------------------------------------------------------------------------------------------------------------------------------------------------------------------------------------------------------------------------------------------------------------------------------------------------------------------------------------------|
| Journal:                      | <i>BMJ Open</i>                                                                                                                                                                                                                                                                                                                                                                                                                                                                                                                                                                                                         |
| Manuscript ID                 | bmjopen-2020-041896                                                                                                                                                                                                                                                                                                                                                                                                                                                                                                                                                                                                     |
| Article Type:                 | Original research                                                                                                                                                                                                                                                                                                                                                                                                                                                                                                                                                                                                       |
| Date Submitted by the Author: | 15-Jul-2020                                                                                                                                                                                                                                                                                                                                                                                                                                                                                                                                                                                                             |
| Complete List of Authors:     | Adamson, Tyler; Johns Hopkins University Bloomberg School of Public Health, Department of Epidemiology, Center for Public Health and Human Rights<br>Hanley, Marguerite ; Tech4HIV<br>Baral, Stefan; Johns Hopkins Sch Publ Hlth, Department of Epidemiology, Center for Public Health and Human Rights<br>Beyrer, C; Johns Hopkins Bloomberg Sch Publ Hlth, Department of Epidemiology, Center for Public Health and Human Rights<br>Wallach, Sara; Johns Hopkins University Bloomberg School of Public Health, Department of Epidemiology, Center for Public Health and Human Rights<br>Howell, Sean; LGBT Foundation |
| Keywords:                     | Epidemiology < TROPICAL MEDICINE, Health policy < HEALTH SERVICES ADMINISTRATION & MANAGEMENT, Public health < INFECTIOUS DISEASES, Respiratory infections < THORACIC MEDICINE                                                                                                                                                                                                                                                                                                                                                                                                                                          |
|                               |                                                                                                                                                                                                                                                                                                                                                                                                                                                                                                                                                                                                                         |

SCHOLARONE™  
Manuscripts

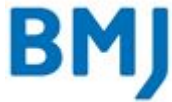

I, the Submitting Author has the right to grant and does grant on behalf of all authors of the Work (as defined in the below author licence), an exclusive licence and/or a non-exclusive licence for contributions from authors who are: i) UK Crown employees; ii) where BMJ has agreed a CC-BY licence shall apply, and/or iii) in accordance with the terms applicable for US Federal Government officers or employees acting as part of their official duties; on a worldwide, perpetual, irrevocable, royalty-free basis to BMJ Publishing Group Ltd ("BMJ") its licensees and where the relevant Journal is co-owned by BMJ to the co-owners of the Journal, to publish the Work in this journal and any other BMJ products and to exploit all rights, as set out in our [licence](#).

The Submitting Author accepts and understands that any supply made under these terms is made by BMJ to the Submitting Author unless you are acting as an employee on behalf of your employer or a postgraduate student of an affiliated institution which is paying any applicable article publishing charge ("APC") for Open Access articles. Where the Submitting Author wishes to make the Work available on an Open Access basis (and intends to pay the relevant APC), the terms of reuse of such Open Access shall be governed by a Creative Commons licence – details of these licences and which [Creative Commons](#) licence will apply to this Work are set out in our licence referred to above.

Other than as permitted in any relevant BMJ Author's Self Archiving Policies, I confirm this Work has not been accepted for publication elsewhere, is not being considered for publication elsewhere and does not duplicate material already published. I confirm all authors consent to publication of this Work and authorise the granting of this licence.

1  
2  
3 Title:  
4

5 **A Rapid, Application-Based Survey to Characterize the Impacts of COVID-19 on LGBTQ+**  
6 **Communities Around the World: an observational study**  
7  
8

9 Authors  
10

11 Tyler Adamson, MPH  
12 Johns Hopkins School of Public Health  
13 Department of Epidemiology  
14 Center for Public Health and Human Rights  
15 615 N. Wolfe Street  
16 Baltimore, MD 21205  
17 USA  
18 [tyler.adamson@jhu.edu](mailto:tyler.adamson@jhu.edu)  
19 (360) 607-5743  
20 Fax: (410) 614-8371  
21  
22

23 Marguerite Hanley, MS, MPA  
24 Tech4HIV  
25 San Francisco, CA  
26 USA  
27

28 Stefan Baral, MD, MPH  
29 Johns Hopkins University School of Public Health  
30 Baltimore, MD  
31 USA  
32

33 Chris Beyrer, MD, MPH  
34 Johns Hopkins University School of Public Health  
35 Baltimore, MD  
36 USA  
37

38 Sara Wallach, MPH  
39 Johns Hopkins University School of Public Health  
40 Baltimore, MD  
41 USA  
42  
43

44 Sean Howell  
45 LGBT Foundation  
46 San Francisco, CA  
47 USA  
48

49 Word Count: 2562  
50

51 Keywords: Sexual and Gender Minorities, Coronavirus Infections, LGBTQ+, COVID-19, Social  
52 Networking  
53  
54  
55  
56  
57  
58  
59

## Abstract

Introduction: Emerging evidence indicates that the COVID-19 pandemic, and the responses it has generated, have had disproportionate impacts on lesbian, gay, bisexual, transgender, and queer (LGBTQ+) communities. Most studies to date have focused on qualitative assessments with limited empiric quantitative study.

Methods: In response, a cross-sectional survey was administered to a global sample of LGBTQ+ individuals (n=13,562) between April 16th and May 20th, 2020 via the social networking application Hornet. The survey contained questions that characterize the impact of COVID-19 and associated mitigation strategies on economics, employment, mental health, and access to healthcare.

Results: 5,241 (43.9%) individuals indicated they were somewhat, slightly, or unable to meet basic needs with their current income, while 2,848 (24.1%) and 4,746 (40.1%) felt physically or emotionally unsafe in their living environment, respectively. 2,217 individuals (24.7%) stated they are at risk for losing health insurance coverage. 2,723 (21.8%) persons reported having skipped or cut meals as there was not enough money.

Conclusion: Many LGBTQ+ persons who responded reported adverse consequences to mental health, economics, interruptions to care, and lack of support from their government. This data is part of ongoing analyses but accentuates the unique needs of LGBTQ+ communities that will require targeted, ameliorative approaches.

## Article Summary

Strengths and limitations of this study:

- Large, global sample of LGBTQ+ persons regarding the impact of COVID-19 - likely one of, if not the first of, its kind
- Considers the immediate and secondary effects of COVID-19 on the LGBTQ+ community
- Led by a multi-sector, collaborative research working group
- Convenience sample of individuals who have resources, including the liberty to use networking-applications such as Hornet
- Underscores the need for improved monitoring and continued data collection to guide future programs and policies

Funding: None.

Author Contributions: TA, MH conducted analyses and drafted figures and tables. TA, MH, SW, SH contributed to the initial drafting of this manuscript. All authors contributed opinions and

1  
2  
3 feedback based on their individual expertise and the policies of their centers critically reviewed  
4 the manuscript. All authors agreed to submit the final version of the manuscript.  
5  
6

7 Declaration of Interests: All authors declare no competing interests.  
8  
9

10 No additional data available currently.  
11  
12  
13  
14  
15  
16  
17  
18  
19  
20  
21  
22  
23  
24  
25  
26  
27  
28  
29  
30  
31  
32  
33  
34  
35  
36  
37  
38  
39  
40  
41  
42  
43  
44  
45  
46  
47  
48  
49  
50  
51  
52  
53  
54  
55  
56  
57  
58  
59  
60

For peer review only

1  
2  
3 This article highlights data collected from a collaborative effort between the LGBT Foundation,  
4 Hornet Gay Social Network, Tech4HIV, and Johns Hopkins University (JHU). The COVID  
5 Disparities Working Group includes these entities with input from the University of California,  
6 San Francisco (UCSF), Google, UNAIDS, The World Health Organization (WHO), and others.  
7 The working group conducted a rapid survey of a global, non-representative sample of LGBTQ+  
8 individuals regarding their experience during the COVID-19 pandemic.  
9

### 12 Introduction:

14  
15 As COVID-19 continues to sweep across the globe, LGBTQ+ communities continue to be  
16 particularly vulnerable, with all stages of the continuum of care and prevention being disrupted.<sup>1,2</sup>  
17 There has been significant heterogeneity in the burden of COVID and the stringency of prevention  
18 and mitigation measures around the world<sup>3</sup>. The ability to rapidly adjust implementation strategies  
19 to maintain physical distancing and adherence to guidelines has likely varied based on underlying  
20 infrastructure and resources, including such aspects as population density, crowded housing, use  
21 of public transportation, rates of incarceration or other group or closed housing settings, and  
22 structural barriers such as stigma, homophobia, and racism.  
23

24  
25  
26  
27 Socio-economic status, and the ability to self-isolate, telecommute, and practice good hygiene have  
28 emerged as social determinants of COVID-19 outcomes. Many vulnerable groups have suffered  
29 disproportionately, including migrant workers in many contexts, undocumented migrants in the  
30 US, prisoners and detainees, and others at the margins of societies. Collectively, gaps of varying  
31 intensity have emerged around the world that may reinforce underlying health and other disparities  
32 and inequities. To assess the socioeconomic and health impacts of the current crisis on LGBTQ+  
33 communities globally, a rapid, application-based survey was developed to collect additional  
34 evidence.  
35  
36  
37

### 38 Methods:

39  
40  
41 This cross-sectional study was conducted based on a COVID-19 disparities survey implemented  
42 by the gay social networking application, Hornet. The app is a free, smart-phone based “Gay Social  
43 Networking” application with over 25 million users worldwide and has previously been used for  
44 conducting research on LGBTQ+ communities worldwide. The data presented here was collected  
45 between April 16, 2020 and May 4, 2020, when Hornet users were invited to participate in a brief  
46 questionnaire with 58 questions regarding the impact of COVID-19 on employment, insurance  
47 coverage, ability to make ends meet, and mental health. Any Hornet user who was over the age of  
48 18 and able to provide consent were eligible. The survey was made available in English, Arabic,  
49 Spanish, French, Russian, Portuguese, Italian, Simplified and Traditional Chinese, Malay, Thai,  
50 Indonesian, Farsi, and Turkish. Only descriptive analysis were conducted on the full sample in  
51 order to characterize the impact on the full, global LGBTQ+ community that the sample  
52  
53  
54  
55  
56  
57  
58  
59

1  
2  
3 represented. Given the nature of convenience sampling and the subsequent descriptive analysis  
4 outlined here, sensitivity analyses and controlling for confounding was deemed not necessary. In  
5 order to account for missing data and minimize response bias between outcomes, each outcome  
6 was analyzed individually with the respective number of individuals who responded. In order to  
7 minimize bias between outcomes, each outcome was analyzed individually with the respective  
8 number of individuals who responded. Study procedures were reviewed by the Johns Hopkins  
9 School of Public Health Institutional Review Board, which determined that the protocol qualified  
10 for Exempt status under Category 4.

11  
12 Eligible, consenting individuals responded to general demographic questions on age, country of  
13 origin, sex assigned at birth, gender identity and sexual orientation. Participants were also asked  
14 about their HIV serostatus. The questionnaire was designed by combining validated instruments  
15 with newly created indicators specific to the impacts of COVID-19 on the following areas: 1)  
16 Mental Health; 2) Economics and Employment; and 3) Access to Care.

### 17 18 19 20 21 22 23 *Patient and Public Involvement*

24  
25 Amidst the ongoing COVID-19 pandemic, efforts were undertaken to characterize the continued  
26 impact on members of the LGBTQ+ community. Given the nature of inequities often faced by  
27 LGBTQ+ persons, special consideration was given to economics, mental health, and access to care  
28 during research question, outcome, and survey development. While the public was not directly  
29 involved in development, the unique needs of the global LGBTQ+ community were centered in  
30 the design, translation, and implementation of this research. Furthermore, there is a significant  
31 representation of LGBTQ+ identifying individuals within the COVID-19 Disparities Working  
32 Group. With clear plans for dissemination of any and all results to the entirety of the Hornet user  
33 base.

### 34 35 36 37 *Mental Health*

38  
39 The survey asked individuals about the impact of the COVID-19 pandemic on their mental health;  
40 anxiety (e.g. “Have you been feeling anxious since the COVID-19 crisis began?”); loneliness (e.g.  
41 “Have you been feeling lonely since the COVID-19 crisis began?”); current living environment  
42 (e.g. “How do you feel about your current living environment?”).

### 43 44 45 46 *Economics and Employment*

47  
48 The impact of COVID-19 on economics and employment were assessed through questions  
49 regarding economic and employment status; type of work (e.g. “What kind of work do you  
50 currently do?”); ability to miss work (e.g. “Can you afford to miss work during COVID-19?”);  
51 ability to meet basic needs (e.g. “How well are you able to meet your basic needs (e.g. food,  
52 clothing, transportation, education, and healthcare) with your current income?”); financial support  
53 from work or government (e.g. “Are you receiving any additional financial benefits from work or  
54 government because of the COVID-19 crisis?”); and access to food (e.g. “Since the COVID-19  
55 crisis began, have you had to cut the size of your meals or skip meals because there was not enough  
56 money for food?”).



### *Access to Care*

Individuals were asked whether about healthcare coverage amid the COVID-19 pandemic, such as source of insurance (e.g. “What is the primary source of healthcare coverage?”); losing insurance (e.g. “Do you expect to lose your health insurance coverage because of the COVID-19 crisis?”)

### Results:

All individuals who consented to taking the survey were considered eligible, though not everyone responded to every question as it did not apply to them, or simply chose not to. The number of persons who responded to individual questions are reported as outcome events for each question.

Between April 16 2020 and May 4, 2020 13,562 individuals from 132 countries responded to the survey (Figure 1), ranging in age from under 18 to 85+. Most respondents were either younger than 30 years old (38.2%) or between the ages of 30 and 49 (49.8%). 12% (n=1,440) respondents indicated that they were living with HIV, and 60% of these indicated that they were undetectable. The data also represent samples from some of the most COVID-affected countries globally, including Russia, Brazil, France, and Mexico. Since only descriptive statistics were conducted on the data collected from an anonymous survey, no efforts to reduce potential sources were undertaken. Additionally, no further subgroup analyses were conducted in order to give a broad, descriptive overview of the impact of COVID-19 on the global LGBTQ+ community.

### *Country of Origin*

Figure 1. highlights the geographic diversity captured by this survey, indicating the global impact of the crisis on members of this community. Majority of respondents were from Asia (64.5%), Europe (18.7%), and Latin America (8.95%), generally reflecting Hornet’s user base. Hornet is used by a diverse community, but the large majority of users are men who have sex with men, with varying identities including gay and bisexual men and other MSM.

### *Mental Health*

Given intersecting stigmas and minority stress, LGBTQ+ communities are well known to bear high burdens of mental health conditions<sup>4</sup> 26.8% (3,285/12,271) of LGBTQ+ persons indicated that they have been feeling very anxious since the COVID-19 crisis began, and another 42.9% (5,259/12,271) indicated that they were a little anxious. Similarly, 27.8% (3,285/12,272) of those who participated indicated that they have been feeling very lonely while another 35.1% (5,259/12,272) indicated that they were a little lonely. Additionally, 2,848 (24.1%) and 4,746 (40.1%) responded that they feel either physically or emotionally unsafe in their current living

1  
2  
3 environment.

4  
5  
6 *Economics and Employment*

7  
8 LGBTQ+ individuals are more likely to be employed in service, sales, and hospitality industries<sup>5</sup>,  
9 all of which are directly and heavily impacted by the COVID-19 crisis. The significance of such  
10 employment demographics are reflected in the data collected, with 26.5% (3,159/11,913) of  
11 persons responding that they work in either the service or hospitality industries and 37.8%  
12 (4,508/11,916) indicating that they cannot afford to miss work during the COVID-19 crisis. Of the  
13 11,928 LGBTQ+ persons who responded to whether or not they were able to meet their basic needs  
14 (e.g., food, clothing, shelter, transportation, education, and healthcare) with their current income,  
15 3,019 (25.4%) indicated only somewhat, 1,715 indicated slightly (14.4%), and 507 (4.3%)  
16 responded not at all. Additionally, 50.1% (4,850/9,690) reported to not be receiving financial  
17 benefits from their government, despite need, while 21.8% (2723/12,509) individuals indicated  
18 that they have had to cut or skip meals because there was not enough money for food. As we seek  
19 to respond to the devastating blow this pandemic has dealt to the economy and the traditional  
20 employment-based health insurance model, we must acknowledge and address the particular  
21 health and economic risk that already marginalized communities face.  
22  
23  
24  
25  
26

27  
28 *Access to Care*

29  
30  
31 There are existing gaps in care for LGBTQ+ individuals, with many being underinsured or lacking  
32 insurance entirely<sup>6</sup>. Those living in countries without a nationalized health program are left at  
33 increased risk for both economic and health-related despair. The high cost of health services that  
34 are required when someone becomes infected with COVID-19 further adds to this already heavy  
35 burden. 15.9% (1,895/11,932) and 46.4% (5,529/11,932) of individuals indicated that they have  
36 no healthcare coverage or it is private/non-governmental/employer-provided, respectively.  
37 Additionally, 9.3% (830/8965) responded that they will definitely or probably lose their insurance  
38 coverage because of COVID-19 and 15.5% (1387/8965) that they might or might not lose  
39 insurance coverage.  
40  
41  
42  
43

44 Discussion:

45  
46 COVID-19 has rapidly emerged as a major public health threat, causing significant global  
47 disruption. Growing evidence indicates that the incidence of COVID-19 is higher in communities  
48 of lower socioeconomic status, in which LGBTQ+ individuals are over-represented given their  
49 long history of economic marginalization<sup>8</sup>. Additionally, higher burdens of mental health and  
50 infectious diseases -- due to the intersection of upstream determinants such as stigma,  
51 criminalization of same-sex practices and sex work, and continued limited investment in these  
52 communities -- place LGBTQ+ individuals at even higher risk. Such compounding vulnerabilities  
53 result in earlier disruptions to health services, leading to prolonged periods without access to care.<sup>7</sup>  
54 Of particular concern are the nearly half of individuals who reported to be struggling or suffering;  
55  
56  
57  
58  
59  
60

1  
2  
3 the third who replied that they were not receiving assistance from their government but needed it;  
4 and the quarter who were unable to see their HIV medical provider or were unsure whether they  
5 would lose their job as a result of the COVID-19 crisis.  
6

7  
8 Notably, there are some limitations of this study. Individuals must be users of Hornet in order to  
9 participate in the survey, and thus must have internet and smartphone access, limiting  
10 generalizability of the findings to a target population of interest. Additionally, emerging evidence  
11 indicates that COVID-19 is having a larger impact on those of lower socioeconomic status (i.e.  
12 without internet or smartphone access); therefore it is possible that this underestimates the true  
13 magnitude of the pandemic on more marginalized individuals in these communities. Even so, prior  
14 studies have documented the success of using social networking platforms to reach hidden and  
15 stigmatized populations. It is also possible that barriers such as language or stigma, led particular  
16 subgroups to not participate or complete the survey in its entirety, resulting in non-response bias.  
17 To mitigate this, we plan to translate later iterations of the study into additional languages.  
18 Meaning that further studies, including but not limited to qualitative interviews, will be required  
19 to characterize the impact of the COVID-19 crisis further. As well, this is a convenience sample  
20 and cross-sectional in nature, so may not be representative of the whole LGBTQ+ community and  
21 precludes our ability to examine temporality in the outcomes we analyzed.  
22  
23

24  
25 Despite these limitations, the novel use of a rapid survey among users of a social network  
26 application provides insight into the effects felt by the LGBTQ+ community in real-time, when it  
27 may otherwise be infeasible to collect such information at scale. A major strength of this study is  
28 the data collected on 13,562 individuals from over 131 countries, which can be used for future  
29 research related to the implications of COVID-19. Collectively, these results reflect the impact  
30 that the pandemic will have on the LGBTQ+ community, and the need for continued monitoring  
31 and policy action as the COVID-19 crisis progresses.  
32  
33

#### 34 Conclusion:

35  
36 These findings represent individuals from 132 countries around the world, and highlight the clear  
37 immediate and secondary effects of COVID-19 on LGBTQ+ communities; while emphasizing the  
38 need for additional data to guide future programs and policies.  
39

40  
41 Many countries do not include recognition or metrics on sexual orientation and gender identity in  
42 their data collection. If not for surveys of this kind, which leverages a global social network and  
43 app-based technology, we would be unable to obtain this quantity of accurate, and real-time  
44 information on how marginalized communities are being impacted by the pandemic, nor at this  
45 level of granularity. This novel, technology-based approach highlights the profoundly detrimental  
46 impact that COVID-19 is having and will continue to have on LGBTQ+ communities, thereby  
47 underscoring the need for a data-driven and timely response, both immediately and in the wake of  
48 this crisis.  
49

50  
51 Figure 1.  
52  
53  
54  
55  
56  
57  
58  
59  
60

## References

1. Jiang H, Zhou Y, Tang W. Maintaining HIV care during the COVID-19 pandemic. *Lancet HIV*. 2020;7(5): e308-e309. doi:10.1016/S2352-3018(20)30105-3
2. Santos, GM, Ackerman, B, Rao A, Wallach, S, Ayala, G, Lamontage, E, Garner, A, Holloway, Arreola, I, Silenzio, V, Strömdahl, S, Yu, L, Strong, C, Adamson, T, Yakusik, A, Doan, T, Huang, P, Cerasuolo, D, Bishop, A, Noori, T, Pharris, A, Aung, M, Dara, M, Chung, S, Hanley, M, Baral, S, Beyrer, C, Howell, S. Economic, Mental Health, HIV Prevention and HIV Treatment Impacts of COVID-19 and the COVID-19 response on a Global Sample of Cisgender Gay Men and Other Men who have sex with Men. *medRxiv* 2020.
3. Hale T, Webster S, Petherick A, Phillips T, and Beatriz K. Oxford COVID-19 Government Response Tracker. *Blavatnik School of Government* 2020; Data use policy: Creative Commons Attribution CC BY standard.
4. Kelleher C. Minority stress and health: Implications for lesbian, gay, bisexual, transgender, and questioning (LGBTQ) young people. *Counselling Psychology Quarterly* 2009; 22(4): 373-9. doi:10.1080/09515070903334995.
5. Human Rights Campaign, Charlie Whittington, Katalina Hadfield, Carina Calderón. The Lives & Likelihoods of many in the LGBTQ Community are at risk amidst COVID-19 Crisis. 2020.
6. Mulé NJ, Ross LE, Deeprose B, Jackson BE, Daley A, Travers A, Moore D. Promoting LGBT health and wellbeing through inclusive policy development. *International journal for equity in health* 2009; 8(1): 18. doi:10.1186/1475-9276-8-18.
7. Fredriksen-Goldsen K, Simoni JM, Kim H, et al. The health equity promotion model: Reconceptualization of lesbian, gay, bisexual, and transgender (LGBT) health disparities. *Am J Orthopsychiatry* 2014; 84(6): 653-63. doi:10.1037/ort0000030.

1  
2  
3  
4  
5  
6  
7  
8  
9  
10  
11  
12  
13  
14  
15  
16  
17  
18  
19  
20  
21  
22  
23  
24  
25  
26  
27  
28  
29  
30  
31  
32  
33  
34  
35  
36  
37  
38  
39  
40  
41  
42  
43  
44  
45  
46  
47

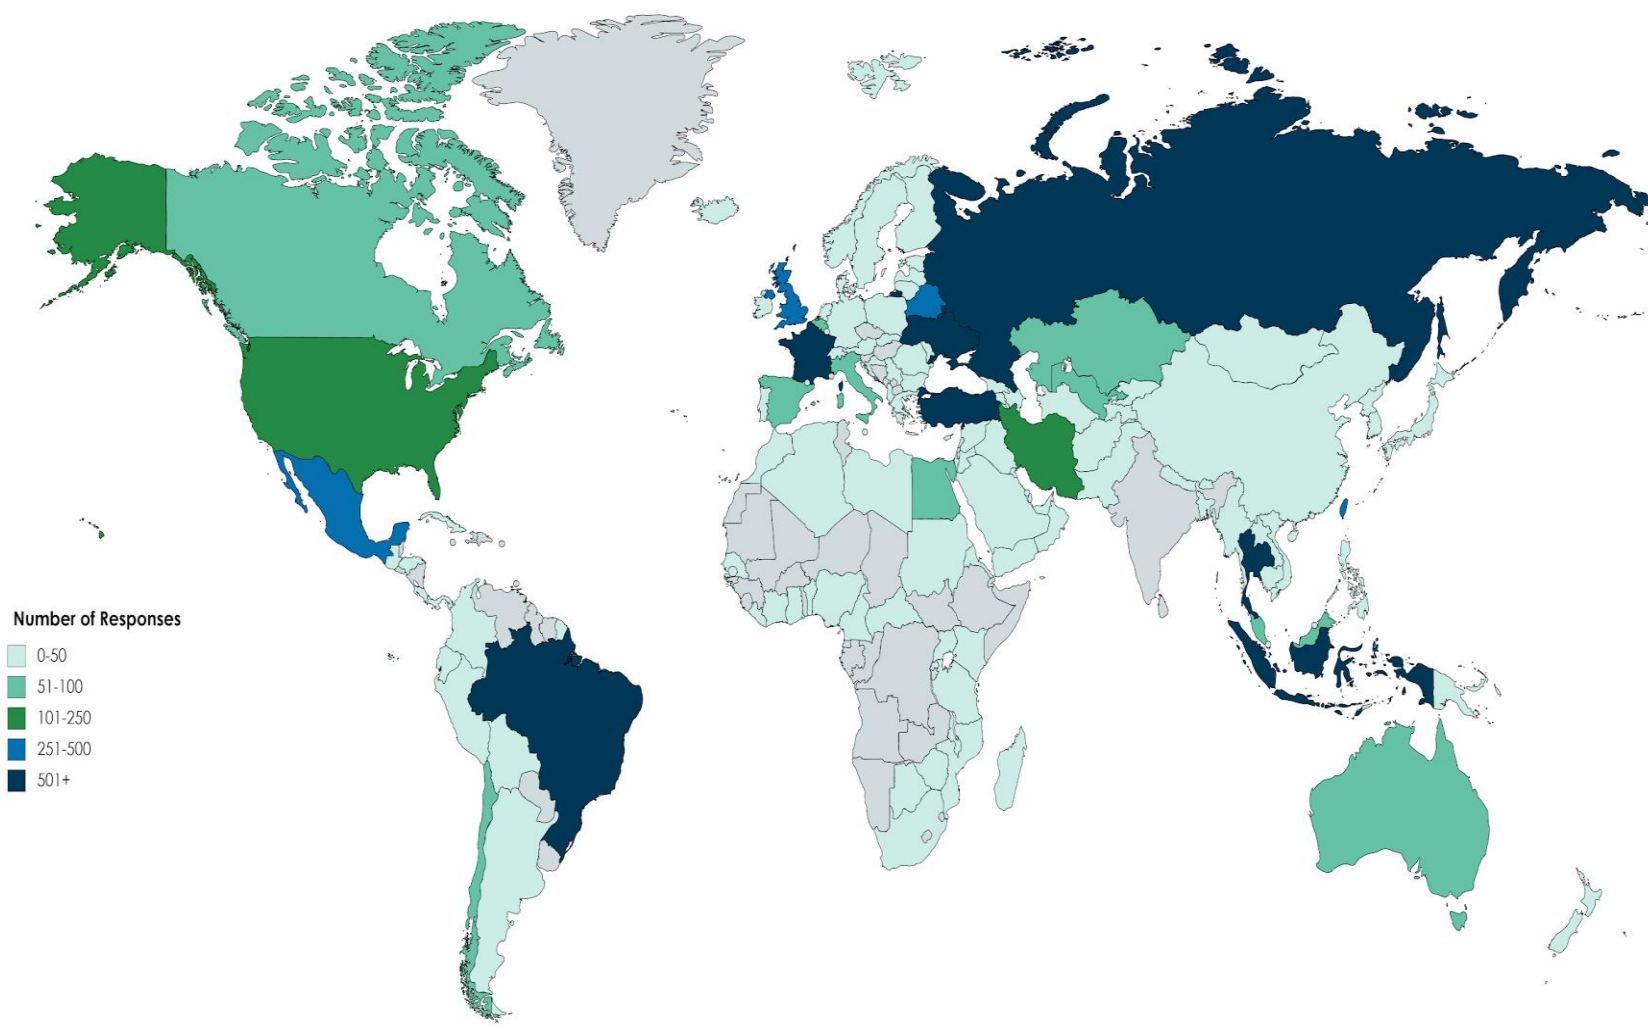

## STROBE Statement—checklist of items that should be included in reports of observational studies

|                              | Item No | Recommendation                                                                                                                                                                                                                                                                                                                                                                                                                                                                                                                                                                                                                                                                                   |
|------------------------------|---------|--------------------------------------------------------------------------------------------------------------------------------------------------------------------------------------------------------------------------------------------------------------------------------------------------------------------------------------------------------------------------------------------------------------------------------------------------------------------------------------------------------------------------------------------------------------------------------------------------------------------------------------------------------------------------------------------------|
| <b>Title and abstract</b>    | 1 ✓     | (a) Indicate the study's design with a commonly used term in the title or the abstract<br>(b) Provide in the abstract an informative and balanced summary of what was done and what was found                                                                                                                                                                                                                                                                                                                                                                                                                                                                                                    |
| <b>Introduction</b>          |         |                                                                                                                                                                                                                                                                                                                                                                                                                                                                                                                                                                                                                                                                                                  |
| Background/rationale         | 2 ✓     | Explain the scientific background and rationale for the investigation being reported                                                                                                                                                                                                                                                                                                                                                                                                                                                                                                                                                                                                             |
| Objectives                   | 3 ✓     | State specific objectives, including any prespecified hypotheses                                                                                                                                                                                                                                                                                                                                                                                                                                                                                                                                                                                                                                 |
| <b>Methods</b>               |         |                                                                                                                                                                                                                                                                                                                                                                                                                                                                                                                                                                                                                                                                                                  |
| Study design                 | 4 ✓     | Present key elements of study design early in the paper                                                                                                                                                                                                                                                                                                                                                                                                                                                                                                                                                                                                                                          |
| Setting                      | 5 ✓     | Describe the setting, locations, and relevant dates, including periods of recruitment, exposure, follow-up, and data collection                                                                                                                                                                                                                                                                                                                                                                                                                                                                                                                                                                  |
| Participants                 | 6 ✓     | (a) <i>Cohort study</i> —Give the eligibility criteria, and the sources and methods of selection of participants. Describe methods of follow-up<br><i>Case-control study</i> —Give the eligibility criteria, and the sources and methods of case ascertainment and control selection. Give the rationale for the choice of cases and controls<br><i>Cross-sectional study</i> —Give the eligibility criteria, and the sources and methods of selection of participants<br>(b) <i>Cohort study</i> —For matched studies, give matching criteria and number of exposed and unexposed<br><i>Case-control study</i> —For matched studies, give matching criteria and the number of controls per case |
| Variables                    | 7 ✓     | Clearly define all outcomes, exposures, predictors, potential confounders, and effect modifiers. Give diagnostic criteria, if applicable                                                                                                                                                                                                                                                                                                                                                                                                                                                                                                                                                         |
| Data sources/<br>measurement | 8* ✓    | For each variable of interest, give sources of data and details of methods of assessment (measurement). Describe comparability of assessment methods if there is more than one group                                                                                                                                                                                                                                                                                                                                                                                                                                                                                                             |
| Bias                         | 9 ✓     | Describe any efforts to address potential sources of bias                                                                                                                                                                                                                                                                                                                                                                                                                                                                                                                                                                                                                                        |
| Study size                   | 10 ✓    | Explain how the study size was arrived at                                                                                                                                                                                                                                                                                                                                                                                                                                                                                                                                                                                                                                                        |
| Quantitative variables       | 11 ✓    | Explain how quantitative variables were handled in the analyses. If applicable, describe which groupings were chosen and why                                                                                                                                                                                                                                                                                                                                                                                                                                                                                                                                                                     |
| Statistical methods          | 12 ✓    | (a) Describe all statistical methods, including those used to control for confounding<br>(b) Describe any methods used to examine subgroups and interactions<br>(c) Explain how missing data were addressed<br>(d) <i>Cohort study</i> —If applicable, explain how loss to follow-up was addressed<br><i>Case-control study</i> —If applicable, explain how matching of cases and controls was addressed<br><i>Cross-sectional study</i> —If applicable, describe analytical methods taking account of sampling strategy<br>(e) Describe any sensitivity analyses                                                                                                                                |

Continued on next page

1  
2  
3  
4  
5  
6  
7  
8  
9  
10  
11  
12  
13  
14  
15  
16  
17  
18  
19  
20  
21  
22  
23  
24  
25  
26  
27  
28  
29  
30  
31  
32  
33  
34  
35  
36  
37  
38  
39  
40  
41  
42  
43  
44  
45  
46  
47  
48  
49  
50  
51  
52  
53  
54  
55  
56  
57  
58  
59  
60**Results**

|                  |     |                                                                                                                                                                                                                   |
|------------------|-----|-------------------------------------------------------------------------------------------------------------------------------------------------------------------------------------------------------------------|
| Participants     | 13* | (a) Report numbers of individuals at each stage of study—eg numbers potentially eligible, examined for eligibility, confirmed eligible, included in the study, completing follow-up, and analysed<br>✓            |
|                  |     | (b) Give reasons for non-participation at each stage                                                                                                                                                              |
|                  |     | (c) Consider use of a flow diagram                                                                                                                                                                                |
| Descriptive data | 14* | (a) Give characteristics of study participants (eg demographic, clinical, social) and information on exposures and potential confounders<br>✓                                                                     |
|                  |     | (b) Indicate number of participants with missing data for each variable of interest                                                                                                                               |
|                  |     | (c) <i>Cohort study</i> —Summarise follow-up time (eg, average and total amount)                                                                                                                                  |
| Outcome data     | 15* | <i>Cohort study</i> —Report numbers of outcome events or summary measures over time<br>✓                                                                                                                          |
|                  |     | <i>Case-control study</i> —Report numbers in each exposure category, or summary measures of exposure                                                                                                              |
|                  |     | <i>Cross-sectional study</i> —Report numbers of outcome events or summary measures                                                                                                                                |
| Main results     | 16  | (a) Give unadjusted estimates and, if applicable, confounder-adjusted estimates and their precision (eg, 95% confidence interval). Make clear which confounders were adjusted for and why they were included<br>✓ |
|                  |     | (b) Report category boundaries when continuous variables were categorized                                                                                                                                         |
|                  |     | (c) If relevant, consider translating estimates of relative risk into absolute risk for a meaningful time period                                                                                                  |
| Other analyses   | 17  | Report other analyses done—eg analyses of subgroups and interactions, and sensitivity analyses<br>✓                                                                                                               |

**Discussion**

|                  |    |                                                                                                                                                                              |
|------------------|----|------------------------------------------------------------------------------------------------------------------------------------------------------------------------------|
| Key results      | 18 | ✓ Summarise key results with reference to study objectives                                                                                                                   |
| Limitations      | 19 | ✓ Discuss limitations of the study, taking into account sources of potential bias or imprecision.<br>✓ Discuss both direction and magnitude of any potential bias            |
| Interpretation   | 20 | ✓ Give a cautious overall interpretation of results considering objectives, limitations, multiplicity of analyses, results from similar studies, and other relevant evidence |
| Generalisability | 21 | ✓ Discuss the generalisability (external validity) of the study results                                                                                                      |

**Other information**

|         |    |                                                                                                                                                                 |
|---------|----|-----------------------------------------------------------------------------------------------------------------------------------------------------------------|
| Funding | 22 | ✓ Give the source of funding and the role of the funders for the present study and, if applicable, for the original study on which the present article is based |
|---------|----|-----------------------------------------------------------------------------------------------------------------------------------------------------------------|

\*Give information separately for cases and controls in case-control studies and, if applicable, for exposed and unexposed groups in cohort and cross-sectional studies.

**Note:** An Explanation and Elaboration article discusses each checklist item and gives methodological background and published examples of transparent reporting. The STROBE checklist is best used in conjunction with this article (freely available on the Web sites of PLoS Medicine at <http://www.plosmedicine.org/>, Annals of Internal Medicine at <http://www.annals.org/>, and Epidemiology at <http://www.epidem.com/>). Information on the STROBE Initiative is available at [www.strobe-statement.org](http://www.strobe-statement.org).

# BMJ Open

## A Rapid, Application-Based Survey to Characterize the Impacts of COVID-19 on LGBTQ+ Communities Around the World: an observational study

|                                 |                                                                                                                                                                                                                                                                                                                                                                                                                                                                                                                                                                                                                         |
|---------------------------------|-------------------------------------------------------------------------------------------------------------------------------------------------------------------------------------------------------------------------------------------------------------------------------------------------------------------------------------------------------------------------------------------------------------------------------------------------------------------------------------------------------------------------------------------------------------------------------------------------------------------------|
| Journal:                        | <i>BMJ Open</i>                                                                                                                                                                                                                                                                                                                                                                                                                                                                                                                                                                                                         |
| Manuscript ID                   | bmjopen-2020-041896.R1                                                                                                                                                                                                                                                                                                                                                                                                                                                                                                                                                                                                  |
| Article Type:                   | Original research                                                                                                                                                                                                                                                                                                                                                                                                                                                                                                                                                                                                       |
| Date Submitted by the Author:   | 04-Feb-2021                                                                                                                                                                                                                                                                                                                                                                                                                                                                                                                                                                                                             |
| Complete List of Authors:       | Adamson, Tyler; Johns Hopkins University Bloomberg School of Public Health, Department of Epidemiology, Center for Public Health and Human Rights<br>Hanley, Marguerite ; Tech4HIV<br>Baral, Stefan; Johns Hopkins Sch Publ Hlth, Department of Epidemiology, Center for Public Health and Human Rights<br>Beyrer, C; Johns Hopkins Bloomberg Sch Publ Hlth, Department of Epidemiology, Center for Public Health and Human Rights<br>Wallach, Sara; Johns Hopkins University Bloomberg School of Public Health, Department of Epidemiology, Center for Public Health and Human Rights<br>Howell, Sean; LGBT Foundation |
| <b>Primary Subject Heading</b>: | Public health                                                                                                                                                                                                                                                                                                                                                                                                                                                                                                                                                                                                           |
| Secondary Subject Heading:      | Epidemiology, Health policy, HIV/AIDS, Public health                                                                                                                                                                                                                                                                                                                                                                                                                                                                                                                                                                    |
| Keywords:                       | Epidemiology < TROPICAL MEDICINE, Health policy < HEALTH SERVICES ADMINISTRATION & MANAGEMENT, Public health < INFECTIOUS DISEASES, Respiratory infections < THORACIC MEDICINE                                                                                                                                                                                                                                                                                                                                                                                                                                          |
|                                 |                                                                                                                                                                                                                                                                                                                                                                                                                                                                                                                                                                                                                         |

SCHOLARONE™  
Manuscripts





I, the Submitting Author has the right to grant and does grant on behalf of all authors of the Work (as defined in the below author licence), an exclusive licence and/or a non-exclusive licence for contributions from authors who are: i) UK Crown employees; ii) where BMJ has agreed a CC-BY licence shall apply, and/or iii) in accordance with the terms applicable for US Federal Government officers or employees acting as part of their official duties; on a worldwide, perpetual, irrevocable, royalty-free basis to BMJ Publishing Group Ltd ("BMJ") its licensees and where the relevant Journal is co-owned by BMJ to the co-owners of the Journal, to publish the Work in this journal and any other BMJ products and to exploit all rights, as set out in our [licence](#).

The Submitting Author accepts and understands that any supply made under these terms is made by BMJ to the Submitting Author unless you are acting as an employee on behalf of your employer or a postgraduate student of an affiliated institution which is paying any applicable article publishing charge ("APC") for Open Access articles. Where the Submitting Author wishes to make the Work available on an Open Access basis (and intends to pay the relevant APC), the terms of reuse of such Open Access shall be governed by a Creative Commons licence – details of these licences and which [Creative Commons](#) licence will apply to this Work are set out in our licence referred to above.

Other than as permitted in any relevant BMJ Author's Self Archiving Policies, I confirm this Work has not been accepted for publication elsewhere, is not being considered for publication elsewhere and does not duplicate material already published. I confirm all authors consent to publication of this Work and authorise the granting of this licence.

1  
2  
3 Title:

4  
5  
6 **A Rapid, Application-Based Survey to Characterize the Impacts of COVID-19 on LGBTQ+**  
7 **Communities Around the World: an observational study**

8  
9 Authors

10  
11  
12 Tyler Adamson, MPH  
13 Johns Hopkins School of Public Health  
14 Department of Epidemiology  
15 Center for Public Health and Human Rights  
16 615 N. Wolfe Street  
17 Baltimore, MD 21205  
18 USA  
19 [tyler.adamson@jhu.edu](mailto:tyler.adamson@jhu.edu)  
20 (360) 607-5743  
21 Fax: (410) 614-8371

22  
23  
24 Marguerite Hanley, MS, MPA  
25 Tech4HIV  
26 San Francisco, CA  
27 USA

28  
29  
30 Stefan Baral, MD, MPH  
31 Johns Hopkins University School of Public Health  
32 Baltimore, MD  
33 USA

34  
35  
36 Chris Beyrer, MD, MPH  
37 Johns Hopkins University School of Public Health  
38 Baltimore, MD  
39 USA

40  
41  
42 Sara Wallach, MPH  
43 Johns Hopkins University School of Public Health  
44 Baltimore, MD  
45 USA

46  
47  
48 Sean Howell  
49 LGBT Foundation  
50 San Francisco, CA  
51 USA

52  
53  
54 Survey Development Team

- 55 1. Angelica Lopez
- 56 2. Edward Sutanto
- 57 3. Omar Cherkaoui
- 58 4. Maryam Motaghi

59  
60 Word Count: 3645

1  
2  
3 51  
4 52 Keywords: Sexual and Gender Minorities, Coronavirus Infections, LGBTQ+, COVID-19, Social  
5 53 Networking  
6  
7 54  
8 55

9 56 Abstract  
10  
11 57

12 58 Introduction: Emerging evidence indicates that the COVID-19 pandemic, and the responses it has  
13 59 generated, have had disproportionate impacts on lesbian, gay, bisexual, transgender, and queer  
14 60 (LGBTQ+) communities. This study seeks to build on existing information and provide regional  
15 61 insight.  
16  
17 62

18 63 Methods: In response, a cross-sectional survey was administered to a global sample of LGBTQ+  
19 64 individuals (n=13,358) between April 16th and May 20th, 2020 via the social networking  
20 65 application Hornet. The survey contained questions that characterize the impact of COVID-19 and  
21 66 associated mitigation strategies on economics, employment, mental health, and access to health  
22 67 care.  
23  
24 68

25 69 Results: 5,191 (43.9%) individuals indicated they were somewhat, slightly, or unable to meet basic  
26 70 needs with their current income, while 2,827 (24.1%) and 4,710 (40.1%) felt physically or  
27 71 emotionally unsafe in their living environment, respectively. 2,202 individuals (24.7%) stated they  
28 72 are at risk for losing health insurance coverage. 2,685 (22.7%) persons reported having skipped or  
29 73 cut meals as there was not enough money.  
30  
31 74

32 75 Conclusion: Many LGBTQ+ persons who responded reported adverse consequences to mental  
33 76 health, economics, interruptions to care, and lack of support from their government. This data is  
34 77 part of ongoing analyses but accentuates the unique needs of LGBTQ+ communities that will  
35 78 require targeted, ameliorative approaches.  
36  
37 79

38 80 Article Summary  
39  
40 81

41 82 Strengths and limitations of this study:

- 42 83 ● Large, global sample of LGBTQ+ persons regarding the impact of COVID-19 - likely one  
43 84 of, if not the first of, its kind
- 44 85 ● Considers the immediate and secondary effects of COVID-19 on the LGBTQ+ community
- 45 86 ● Led by a multi-sector, collaborative research working group
- 46 87 ● Convenience sample of individuals who have resources, including the liberty to use  
47 88 networking-applications such as Hornet
- 48 89 ● Underscores the need for improved monitoring and continued data collection to guide  
49 90 future programs and policies

50 91 Funding: None.  
51  
52  
53  
54  
55  
56  
57  
58  
59  
60

1  
2  
3  
4  
5  
6  
7  
8  
9  
10  
11  
12  
13  
14  
15  
16  
17  
18  
19  
20  
21  
22  
23  
24  
25  
26  
27  
28  
29  
30  
31  
32  
33  
34  
35  
36  
37  
38  
39  
40  
41  
42  
43  
44  
45  
46  
47  
48  
49  
50  
51  
52  
53  
54  
55  
56  
57  
58  
59  
60

92

Author Contributions: TA, MH conducted analyses and drafted figures and tables. TA, MH, SW, SB, CB, SH contributed to the initial drafting of this manuscript. All authors contributed opinions and feedback based on their individual expertise and the policies of their centers critically reviewed the manuscript. All authors agreed to submit the final version of the manuscript.

97

Declaration of Interests: All authors declare no competing interests.

99

No additional data available currently.

101

102

103

104

105

106

107

108

109

110

111

112

113

114

115

116

117

118

119

120

121

122

123

124

125

126

127

128

129

130

131

1  
2  
3 132  
4  
5 133  
6 134 This article highlights data collected from a collaborative effort between the LGBT Foundation,  
7 135 Hornet Gay Social Network, Tech4HIV, and Johns Hopkins University (JHU). The COVID  
8 136 Disparities Working Group includes these entities with input from the University of California,  
9 137 San Francisco (UCSF), Google, UNAIDS, The World Health Organization (WHO), and others.  
10 138 The working group conducted a rapid survey of a global, non-representative sample of LGBTQ+  
11 139 individuals regarding their experience during the COVID-19 pandemic.  
12  
13  
14 140

#### 15 141 Introduction:

16 142  
17  
18 143 COVID-19 continues to sweep across the globe, with over 100 million confirmed cases and 2.2  
19 144 million deaths.[1] LGBTQ+ communities continue to be particularly vulnerable, with all stages  
20 145 of the continuum of care and prevention being disrupted.[2–4] There has been significant  
21 146 heterogeneity in the burden of COVID and the stringency of prevention and mitigation measures  
22 147 around the world. [5] The ability to rapidly adjust implementation strategies to maintain physical  
23 148 distancing and adherence to guidelines has likely varied based on underlying infrastructure and  
24 149 resources, including such aspects as population density, crowded housing, use of public  
25 150 transportation, rates of incarceration or other group or closed housing settings, and structural  
26 151 barriers such as stigma, homophobia, and racism. While these efforts have helped to curb the  
27 152 growth of new cases, they've had vast social, economic, and health care consequences.[6–8]  
28  
29  
30  
31 153

32 154 Socio-economic status, and the ability to self-isolate, telecommute, and practice good hygiene  
33 155 have emerged as social determinants of COVID-19 outcomes. Many vulnerable groups have  
34 156 suffered disproportionately, including migrant workers in many contexts, undocumented  
35 157 migrants, ethnic/racial minorities, prisoners and detainees, and others at the margins of societies  
36 158 [9–11]. Reports also indicate the unique concerns and challenges experienced by members of the  
37 159 LGBTQ+ community resulting from anti-gay backlash and community crackdown under false  
38 160 pretexts. [12–14] Moreover, many members of the LGBTQ+ community are at increased risk for  
39 161 food insecurity, unemployment, and unstable housing, thereby making them more vulnerable to  
40 162 the economic and health impacts from COVID-19. [7,15–18]  
41  
42  
43  
44 163

45 164 COVID-19 may also amplify existing barriers to HIV prevention, testing, and care, which could  
46 165 also slow efforts to achieve global HIV targets. [19] Members of the LGBTQ community are  
47 166 among those at highest risk for HIV, with gay men and other MSM being 22 times more likely to  
48 167 acquire HIV than the worldwide general population. [20] Reductions in access to HIV testing,  
49 168 condoms, Pre-Exposure-Prophylaxis (PEP), Post-Exposure Prophylaxis put this community at  
50 169 higher risk for seroconversion. [21–26] These interruptions also have wide-ranging implications  
51 170 for those who do seroconvert, or who are already living with HIV, such as increased viral load,  
52 171 increased transmission, and even drug resistance[27–29] Highlighting the impact of COVID-19  
53  
54  
55  
56  
57  
58  
59  
60

1  
2  
3 172 on the HIV care continuum will be of crucial importance both during and beyond the pandemic.  
4 173 Collectively, gaps of varying intensity have emerged around the world likely reinforce  
5 174 underlying health and other disparities and inequities. For members of the LGTBQ+ community,  
6 175 existing structural vulnerabilities demand a unique and targeted response to COVID-10 to  
7 176 ameliorate its impacts. Additionally, given the wide variation in sociopolitical climates and  
8 177 responses to COVID-19 in countries around the world, regional analyses will be critical to  
9 178 examine how sub-populations are being disproportionately affected, including racial/ethnic  
10 179 minorities, immigrants, sex workers, and socio-economically disadvantaged groups. To assess  
11 180 the socioeconomic and health impacts of the current crisis on LGBTQ+ individuals around the  
12 181 world, a rapid, application-based survey was developed to collect additional evidence.  
13  
14  
15  
16  
17

### 18 Methods:

19 184  
20 185 This cross-sectional study was conducted based on data collected from the COVID-19 disparities  
21 186 survey implemented by the gay social networking application, Hornet. The app is a free, smart  
22 187 phone based “Gay Social Networking” application with over 25 million users worldwide and has  
23 188 previously been used for conducting research on LGBTQ+ communities worldwide. The data  
24 189 presented here was collected between April 16, 2020 and May 4, 2020, when Hornet users were  
25 190 invited to participate in a brief questionnaire with 58 questions regarding demographics and the  
26 191 impact of COVID-19 on economic vulnerability, access to care, and mental health. Any Hornet  
27 192 user who was over the age of 18 and able to provide consent were eligible. The survey was made  
28 193 available in English, Arabic, Spanish, French, Russian, Portuguese, Italian, Simplified and  
29 194 Traditional Chinese, Malay, Thai, Indonesian, Farsi, and Turkish. Only descriptive analysis were  
30 195 conducted on the full sample in order to characterize the impact on the full, global LGBTQ+  
31 196 community that the sample represented. There is wide variation in the acceptance and  
32 197 marginalization of LGBTQ+ people around the world, and to control for such differences,  
33 198 individual responses were stratified and analyzed by World Health Organization (WHO) regions.  
34 199 The aim of this descriptive analysis was to lay a foundation and fill in data gaps on the economic  
35 200 and health impact of COVID-19 on LGBTQ+ communities around the world, creating an  
36 201 opportunity for researchers who are more familiar with such differences to expand on and further  
37 202 contextualize the results presented here. Given the nature of convenience sampling and the  
38 203 subsequent descriptive analysis outlined here, sensitivity analyses and controlling for  
39 204 confounding was deemed not necessary.  
40  
41  
42  
43  
44  
45  
46  
47

48 206 To ensure the equality of our sample, duplicates were screened out based on IP address, and  
49 207 searched for identical responses to randomly selected variables, but found none. In order to  
50 208 minimize bias between outcomes, each outcome was analyzed individually with the respective  
51 209 number of individuals who responded. Study procedures were reviewed by the Johns Hopkins  
52 210 School of Public Health Institutional Review Board, which determined that the protocol qualified  
53  
54  
55  
56  
57  
58  
59

1  
2  
3 211 for Exempt status under Category 4.

4 212

5  
6 213 Measures:

7 214 Eligible, consenting individuals responded to general demographic questions on age, country of  
8 215 origin, sex assigned at birth, gender identity and sexual orientation. Participants were also asked  
9 216 about their HIV serostatus. The questionnaire was designed by combining validated instruments  
10 217 with newly created indicators specific to the impacts of COVID-19 on the following areas: 1)  
11 218 Mental Health; 2) Economics and Employment; and 3) Access to Care.

12  
13 219

14  
15 220 *Patient and Public Involvement*

16  
17 221 Amidst the ongoing COVID-19 pandemic, efforts were undertaken to characterize the continued  
18 222 impact on members of the LGBTQ+ community. Given the nature of inequities often faced by  
19 223 LGBTQ+ persons, special consideration was given to economics, mental health, and access to care  
20 224 during research question, outcome, and survey development. While the public was not directly  
21 225 involved in development, the unique needs of the global LGBTQ+ community were centered in  
22 226 the design, translation, and implementation of this research. Furthermore, there is a significant  
23 227 representation of LGBTQ+ identifying individuals within the COVID-19 Disparities Working  
24 228 Group. With clear plans for dissemination of any and all results to the entirety of the Hornet user  
25 229 base.

26  
27  
28  
29 230 *Demographic Measures:*

30  
31 231 Individuals self-reported their age, country of origin, socioeconomic status, history of sex work,  
32 232 years of education, ethnic minority and immigrations status, and access to mask. To increase the  
33 233 power of our analyses, sexual orientation was collapsed into three groups: gay, bisexual, other  
34 234 (lesbian, heterosexual, asexual, pansexual, questioning, and I don't know). Individuals also self-  
35 235 reported gender identity from the following options: gender nonbinary, transgender woman,  
36 236 transgender man, woman, or man.

37  
38  
39 237 *Mental Health*

40  
41 238 The survey asked individuals about the impact of the COVID-19 pandemic on their mental health.  
42 239 For indicators of mental health we used the 4-item patient health questionnaire (PHQ-4) to screen  
43 240 for symptoms of depression and anxiety and overall category of psychological distress (none, mild,  
44 241 moderate, severe). [30] Individuals were also asked how they feel about their current living  
45 242 environment (e.g. "How do you feel about your current living environment?") and whether it was  
46 243 emotionally and physically safe

47  
48  
49 244 *Economics and Employment*

50  
51 245 The impact of COVID-19 on economics and employment was assessed through questions  
52 246 regarding economic and employment status; type of work (e.g. "What kind of work do you  
53 247 currently do?"); ability to miss work (e.g. "Can you afford to miss work during COVID-19?");  
54 248 ability to meet basic needs (e.g. "How well are you able to meet your basic needs (e.g. food,  
55 249 clothing, transportation, education, and healthcare) with your current income?"); financial support

from work or government (e.g. “Are you receiving any additional financial benefits from work or government because of the COVID-19 crisis?”); reductions in income (e.g. “How much are you expecting your income to reduce because of the COVID-19 crisis?”) and access to food (e.g. “Since the COVID-19 crisis began, have you had to cut the size of your meals or skip meals because there was not enough money for food?”).

### 255 *Access to Care*

256 Individuals were asked about health care coverage amid the COVID-19 pandemic, such as source  
257 of insurance (e.g. “What is the primary source of healthcare coverage?”), which was trichotomized  
258 as government insurance, no insurance, or private/employer/other; losing insurance (e.g. “Do you  
259 expect to lose your health insurance coverage because of the COVID-19 crisis?”; access to masks  
260 (e.g. “Do you have access to masks for COVID-19 protection), which was then dichotomized into  
261 a positive sentiment (“Yes”) and negative sentiment (“No”). To further quantify access to care,  
262 individuals were asked whether COVID-19 had impacted their access to HIV prevention strategies,  
263 including condoms, testing, PrEP, and PEP using Likert-type questions (e.g., “Do you feel you  
264 have access to HIV prevention strategies during the COVID-19 crisis?” with the following  
265 response options: “Definitely yes”, “Probably yes”, “Might or might not”, “Probably not”,  
266 “Definitely not”).

### 267 Results:

268  
269 All individuals who consented to taking the survey were considered eligible, though not  
270 everyone responded to every question as it did not apply to them, or simply chose not to. The  
271 number of persons who responded to individual questions are reported as outcome events for  
272 each question.

273  
274 Between April 16 2020 and May 4, 2020 13,358 individuals from 136 countries responded to the  
275 survey (Table 1), ranging in age from under 18 to 85+. Most respondents were either younger  
276 than 30 years old (39.5%) or between the ages of 30 and 49 (49.8%). 12% (n=1,425)  
277 respondents indicated that they were living with HIV, and 60% of these indicated that they were  
278 undetectable. Individuals were educated and living in metropolitan areas, with 50.0% having a  
279 university degree or more and 72% living in a large or capital city.

280  
281 Table 1: Demographics of LGBTQ+ individuals from the COVID-19 Disparities Survey distributed  
282 between April 16 and May 4, 2020, stratified by WHO region

| Variable | Overall (%) | Africa    | Americas   | Southeast Asia | Europe      | Eastern Mediterranean | Western Pacific | p-value <sup>c</sup> |
|----------|-------------|-----------|------------|----------------|-------------|-----------------------|-----------------|----------------------|
| Age      | 13557       | 103       | 1459       | 1262           | 9363        | 536                   | 641             | 0.007*               |
| >19      | 740 (5.5)   | 9 (8.7)   | 30 (2.1)   | 61 (4.8)       | 578 (6.2)   | 29 (5.4)              | 33 (5.2)        |                      |
| 20-29    | 4534 (34.0) | 43 (41.8) | 349 (23.9) | 470 (37.2)     | 3255 (34.7) | 207 (38.6)            | 213 (33.2)      |                      |



|                                 |                |              |                |               |                |            |               |             |
|---------------------------------|----------------|--------------|----------------|---------------|----------------|------------|---------------|-------------|
| 30-49                           | 6659(49.8<br>) | 40<br>(38.8) | 736<br>(50.4)  | 622<br>(49.3) | 4672<br>(49.9) | 377 (51.7) | 316<br>(49.3) |             |
| 50+                             | 1424(10.7<br>) | 11<br>(10.7) | 344<br>(23.6)  | 109 (8.7)     | 858<br>(9.2)   | 23 (4.3)   | 79<br>(12.3)  |             |
| Years of Education <sup>b</sup> |                | 90           | 1253           | 1057          | 8573           | 429        | 573           | 0.000*<br>* |
| Less than 6 years               | 742 (6.2)      | 18<br>(20.0) | 70 (5.6)       | 198<br>(18.7) | 1259<br>(14.7) | 56 (13.1)  | 61<br>(10.6)  |             |
| Between 6 and 12 years          | 1661(13.9<br>) | 5<br>(5.6)   | 8 (0.6)        | 45 (4.3)      | 661<br>(7.7)   | 18 (4.2)   | 5 (0.9)       |             |
| Some university but no degree   | 2199<br>(18.4) | 19<br>(21.1) | 319<br>(25.5)  | 160<br>(15.1) | 1564<br>(18.2) | 60 (14.0)  | 78<br>(13.6)  |             |
| Trade school                    | 1387<br>(11.6) | 12<br>(13.3) | 99 (7.9)       | 117<br>(11.0) | 1042<br>(12.2) | 43 (10.0)  | 75<br>(13.1)  |             |
| University degree or more       | 5981<br>(50.0) | 36<br>(40.0) | 757<br>(60.4)  | 537<br>(50.8) | 4047<br>(47.2) | 252 (58.7) | 354<br>(61.8) |             |
| Ethnic Minority <sup>b</sup>    | 13616          | 89           | 1248           | 1043          | 8547           | 423        | 570           | 0.08        |
| Yes                             | 2064<br>(15.2) | 36<br>(40.4) | 226<br>(18.1)  | 247<br>(23.7) | 1320<br>(15.4) | 142 (33.6) | 93<br>(16.3)  |             |
| No                              | 9852<br>(72.4) | 37<br>(41.6) | 915<br>(73.3)  | 517<br>(49.6) | 6093<br>(71.3) | 169 (39.9) | 423<br>(74.2) |             |
| I don't know/refuse             | 1700<br>(12.5) | 16<br>(18.0) | 107<br>(8.6)   | 279<br>(23.7) | 1134<br>(13.3) | 112 (26.5) | 54 (9.5)      |             |
| Immigration Status <sup>b</sup> | 11040          | 83           | 1182           | 905           | 7978           | 358        | 537           | 0.27        |
| First generation                | 547 (5.0)      | 5 (6.0)      | 70 (5.9)       | 31 (3.4)      | 382<br>(4.8)   | 20 (5.6)   | 39 (7.3)      |             |
| Immigrant                       | 1408<br>(12.8) | 24<br>(28.9) | 89 (7.5)       | 151<br>(16.7) | 947<br>(11.9)  | 106 (29.6) | 92 (1.3)      |             |
| Parents are native              | 9085<br>(82.2) | 54<br>(65.1) | 1023<br>(86.6) | 723<br>(79.9) | 6649<br>(83.3) | 232 (64.8) | 406<br>(75.6) |             |
| Urban/rural <sup>b</sup>        | 11932          | 90           | 1246           | 1048          | 8558           | 424        | 571           | 0.021*      |
| A capital city                  | 3612<br>(30.3) | 34<br>(37.8) | 531<br>(42.6)  | 367<br>(35.0) | 2345<br>(27.4) | 179 (42.2) | 158<br>(27.7) |             |
| A farm or isolated house        | 95 (0.8)       | 0<br>(0.0)   | 4 (0.3)        | 16 (1.5)      | 67<br>(0.8)    | 6 (1.4)    | 2 (0.3)       |             |
| A large city                    | 4631<br>(38.8) | 16<br>(17.8) | 368<br>(29.5)  | 198<br>(18.9) | 3732<br>(43.6) | 123 (29.0) | 194<br>(34.0) |             |
| A rural area or village         | 646 (5.4)      | 8 (8.9)      | 17 (1.4)       | 159<br>(15.2) | 402<br>(4.7)   | 20 (4.7)   | 41 (7.2)      |             |
| A small city or town            | 1972<br>(16.5) | 16<br>(17.8) | 223<br>(17.9)  | 133<br>(12.7) | 1448<br>(16.9) | 63 (14.9)  | 91<br>(15.9)  |             |
| A suburb                        | 976 (8.2)      | 16           | 103 (8.3)      | 175           | 564            | 33 (7.8)   | 85            |             |

|                                         |                |              |                |               |                |            |               |      |
|-----------------------------------------|----------------|--------------|----------------|---------------|----------------|------------|---------------|------|
| near large city                         |                | (17.8)       |                | (16.7)        | (6.6)          |            | (14.9)        |      |
| Sexual Orientation <sup>b</sup>         | 11980          | 91           | 1252           | 1054          | 8586           | 430        | 572           | 0.13 |
| Gay                                     | 8939<br>(74.6) | 12<br>(13.2) | 149<br>(11.9)  | 195<br>(18.5) | 1513<br>(17.6) | 74 (17.2)  | 66<br>(11.5)  |      |
| Bisexual                                | 2009<br>(16.7) | 57<br>(62.6) | 1048<br>(83.7) | 746<br>(70.8) | 6354<br>(74.0) | 254 (59.1) | 484<br>(84.6) |      |
| Others (lesbian, heterosexual, asexual) | 1032 (8.6)     | 22<br>(24.2) | 55 (4.4)       | 113<br>(10.7) | 719<br>(8.4)   | 102 (23.7) | 22 (3.9)      |      |
| Intersex                                | 132            | 2            | 2              | 65            | 35             | 21         | 7             |      |
| Gender Identity <sup>a,b</sup>          | 11928          | 90           | 1250           | 1047          | 8569           | 429        | 572           | 0.39 |
| Gender nonbinary                        |                | 15           | 56             | 187           | 286            | 20         | 23            |      |
| Transgender woman                       |                | 5            | 4              | 21            | 94             | 35         | 6             |      |
| Transgender man                         |                | 3            | 8              | 31            | 48             | 9          | 6             |      |
| Man                                     |                | 67           | 1151           | 807           | 7947           | 364        | 532           |      |
| Woman                                   |                | 11           | 5              | 10            | 100            | 9          | 6             |      |
| I don't know or I do not wish to answer |                | 10           | 51             | 110           | 384            | 46         | 23            |      |
| HIV Status <sup>b</sup>                 | 11929          | 91           | 1251           | 1047          | 8554           | 420        | 572           | 0.11 |
| I don't know                            |                | 15<br>(16.5) | 132<br>(10.5)  | 233<br>(22.2) | 1217<br>(14.2) | 53 (12.6)  | 78 (1.6)      |      |
| I don't want to answer                  |                | 3 (3.3)      | 36 (2.9)       | 97 (9.3)      | 374<br>(4.4)   | 20 (7.8)   | 23 (4.0)      |      |
| I'm HIV-Negative                        |                | 60<br>(65.9) | 779<br>(62.3)  | 581<br>(55.5) | 6059<br>(70.8) | 324 (77.1) | 426<br>(74.5) |      |
| I'm HIV-Positive                        |                | 7 (7.7)      | 96 (7.7)       | 66 (6.3)      | 372<br>(4.3)   | 13 (3.1)   | 9 (1.6)       |      |
| I'm HIV-Positive and Undetectable       |                | 6 (6.6)      | 208<br>(16.6)  | 70 (6.7)      | 532<br>(6.3)   | 10 (2.4)   | 36 (6.3)      |      |
| Sex work <sup>b</sup>                   | 11787          | 87           | 1219           | 1027          | 8486           | 420        | 554           | 0.24 |
| I don't know/refuse                     | 710            | 3<br>(3.5)   | 32 (3.6)       | 65 (6.3)      | 552<br>(6.5)   | 37 (8.8)   | 22 (4.0)      |      |
| Never                                   | 9564<br>(72.4) | 63<br>(72.4) | 1041<br>(85.4) | 720<br>(70.1) | 6938<br>(81.8) | 304 (72.4) | 501<br>(90.4) |      |
| Yes                                     | 1513           | 21<br>(24.1) | 146<br>(12.0)  | 242<br>(23.6) | 996<br>(11.7)  | 79 (18.8)  | 301<br>(5.6)  |      |

|                                      |                |              |                |               |                |            |               |        |
|--------------------------------------|----------------|--------------|----------------|---------------|----------------|------------|---------------|--------|
| Socioeconomic Status                 | 11983          | 91           | 1254           | 1060          | 8580           | 430        | 573           | 0.007* |
| Lower                                | 1079           | 13<br>(14.3) | 111 (8.8)      | 161<br>(15.2) | 688<br>(8.0)   | 60 (14.0)  | 47 (8.2)      |        |
| Lower middle                         | 4733           | 30<br>(32.0) | 574<br>(45.8)  | 506<br>(47.7) | 3227<br>(37.6) | 166 (38.6) | 231<br>(40.3) |        |
| Upper middle                         | 704            | 12<br>(13.2) | 70 (5.6)       | 50 (4.7)      | 520<br>(6.0)   | 22 (5.1)   | 31 (5.4)      |        |
| Upper                                | 5467           | 36<br>(39.5) | 499<br>(39.8)  | 343<br>(32.4) | 4145<br>(48.3) | 182 (42.3) | 264<br>(46.1) |        |
| Government Restrictions <sup>b</sup> | 12212          | 92           | 1282           | 1116          | 8657           | 433        | 582           | 0.045* |
| Complete restriction                 | 1087<br>(8.9)  | 19<br>(20.6) | 84 (6.6)       | 179<br>(16.6) | 743<br>(8.6)   | 43 (9.9)   | 19 (3.3)      |        |
| Somewhat restricted                  | 8093<br>(66.3) | 64<br>(69.6) | 1027<br>(80.1) | 780<br>(72.5) | 5643<br>(65.2) | 264 (61.0) | 225<br>(38.7) |        |
| No restrictions                      | 3032<br>(24.8) | 9 (9.8)      | 171<br>(13.3)  | 117<br>(10.9) | 2271<br>(26.2) | 126 (29.1) | 338<br>(58.0) |        |

<sup>a</sup>Individuals who reported more than one gender identity were calculated by overall regional count

<sup>b</sup>Denominators excluded individuals who did not respond

<sup>c</sup>p-values were calculated using a one-way analysis of variance (ANOVA) between WHO regions

\* Denotes p-value <0.05

\*\* Denotes p-value <0.001

The data also represent samples individuals from some of the most COVID-affected countries globally, including Russia, Brazil, France, and Mexico. Since only descriptive statistics were conducted on the data collected from an anonymous survey, no efforts to reduce potential sources of bias were undertaken. To account for economic, sociopolitical and geographic differences, responses were stratified by WHO region, but no further subgroup analyses were conducted in order to give a broad, descriptive overview of the impact of COVID-19 on the global LGBTQ+ community. Figure 1 highlights the geographic diversity captured by this survey, indicating the global impact of the crisis on members of this community. Majority of respondents were from Europe (70.1%), Americas (10.9%), and Southeast Asia (9.5%), generally reflecting Hornet's user base. Hornet is used by a diverse community, with nearly 25% of users identifying as non-gay.

### *Mental Health*

Given intersecting stigmas and minority stress, LGBTQ+ communities are well known to bear high burdens of mental health conditions [31–35] 51.4% of individuals reported moderate to severe psychological distress as measured by the PHQ-4 scale (18.0% moderate, 31.4% severe) and there was a statistically significant difference between regions ( $F(5,18)=34.218$ ,  $p=0.000$ ). Based on the anxiety and depression subscales (Table 2), 4003 individuals (36.4%) screened

309 positive for anxiety, and 4639 individuals (41.6%) of individuals screen positive for depression.  
 310 For both anxiety and depression screens, there was a statistically significant difference between  
 311 WHO regions, as determined by one-way ANOVA tests ( $F(6,7)= 5.266, p=0.016$  and  $F$   
 312  $(6,7)=9.828 p=.0004$ ). Additionally, 40.1% of individuals reported that they felt emotionally  
 313 unsafe in their current environment and 24.1% physically unsafe and the difference between  
 314 regions was statistically significant ( $F(5,18) = 43.822, p=0.000$ )

315

316 Table 2: Mental health indicators among LGBTQ+ individuals from the COVID-19 Disparities Survey  
 317 distributed between April 16 and May 4, 2020, stratified by WHO region

| Indicator                      | Overall (%)    | Africa       | Americas      | Southeast Asia | Europe         | Eastern Mediterranean | Western Pacific | p-value <sup>c</sup> |
|--------------------------------|----------------|--------------|---------------|----------------|----------------|-----------------------|-----------------|----------------------|
| Total PHQ-4 <sup>b</sup>       | 10939          | 79           | 1153          | 915            | 7874           | 379                   | 539             | 0.000*<br>*          |
| None                           | 3527<br>(32.2) | 21<br>(26.6) | 311<br>(27.0) | 245<br>(26.8)  | 2645<br>(33.6) | 107 (28.2)            | 198<br>(36.7)   |                      |
| Mild                           | 2015<br>(18.4) | 15<br>(19.0) | 191<br>(16.5) | 143<br>(15.6)  | 1512<br>(19.2) | 89 (23.5)             | 65<br>(12.1)    |                      |
| Moderate                       | 3431<br>(31.4) | 14<br>(17.7) | 440<br>(38.2) | 405<br>(44.3)  | 2288<br>(29.0) | 59 (15.5)             | 225<br>(41.7)   |                      |
| Severe                         | 1966(18.0<br>) | 29<br>(36.7) | 211<br>(18.3) | 122<br>(13.3)  | 1429<br>(12.2) | 124 (32.7)            | 51 (9.5)        |                      |
| Anxiety Screen <sup>b</sup>    | 11006          | 79           | 1169          | 918            | 7922           | 379                   | 539             | 0.005*               |
| Positive                       | 4003<br>(36.4) | 43<br>(54.4) | 463<br>(39.6) | 274<br>(29.9)  | 2885<br>(36.4) | 218 (57.5)            | 120<br>(22.3)   |                      |
| Negative                       | 7003<br>(63.6) | 36<br>(45.6) | 706<br>(60.4) | 644<br>(70.1)  | 5037<br>(63.6) | 161 (42.5)            | 419<br>(77.7)   |                      |
| Depression Screen <sup>b</sup> | 11153          | 82           | 1166          | 942            | 8031           | 386                   | 546             | 0.001*<br>*          |
| Positive                       | 4639<br>(41.6) | 48<br>(41.5) | 411<br>(35.3) | 316<br>(33.5)  | 3490<br>(43.5) | 226 (41.5)            | 148<br>(27.1)   |                      |
| Negative                       | 6514<br>(58.4) | 34<br>(58.5) | 755<br>(64.7) | 626<br>(66.5)  | 4541<br>(56.5) | 160 (58.5)            | 398<br>(72.9)   |                      |

|                                                 |       |     |      |      |      |     |     |        |
|-------------------------------------------------|-------|-----|------|------|------|-----|-----|--------|
| Current Environment <sup>a</sup> , <sup>b</sup> | 11741 | 103 | 1459 | 1262 | 9363 | 536 | 641 | 0.000* |
| Physically Unsafe                               |       | 25  | 244  | 156  | 2210 | 147 | 45  |        |
| Emotionally Unsafe                              |       | 31  | 476  | 212  | 3665 | 207 | 120 |        |
| Physically safe                                 |       | 38  | 663  | 542  | 3815 | 124 | 416 |        |
| Emotionally Safe                                |       | 29  | 485  | 323  | 2533 | 82  | 344 |        |
| I don't know                                    |       | 11  | 91   | 192  | 1271 | 71  | 52  |        |

<sup>a</sup>Question was select all that apply and were calculated by overall regional count

<sup>b</sup> Denominators excluded individuals who did not respond

<sup>c</sup> p-values were calculated using a one-way analysis of variance (ANOVA) between WHO regions

\* Denotes p-value <0.05

\*\* Denotes p-value <0.001

### *Economics and Employment*

LGBTQ+ individuals are more likely to be employed in service, sales, and hospitality industries all of which are directly and heavily impacted by the COVID-19 crisis.[7,17,36] The significance of such employment demographics are reflected in the data collected (Table 4), with 23·8% (3,128/13115) of persons responding that they work in either the service or hospitality industries and 13·7% (1625/11,827) indicating that they already lost their job as a result of the COVID-19 crisis. Nearly 50% of individuals indicated that they were not able to completely meet their basic needs (e.g., food, clothing, shelter, transportation, education, and healthcare), which was significant between regions ( $F(5,24)=12.080$ ,  $p=0.000$ ). Furthermore, 1 out of every 4 individuals indicated that they have skipped or cut meals, although there was no significant difference between regions. Of those who responded, 1 in every 3 individuals expected at least a 30% reduction in income as a result of COVID-19, the difference of which between regions was significant ( $F(5,18)=59.1$ ,  $p=0.000$ ). Lastly, and perhaps most importantly, more than 80% of individuals responded that they had not received financial support from work or government, and 1 in 2 indicated that it was needed ( $F(5,18)=4.16$ ,  $p=0.01$ ).

Table 3: Economic and indicators among LGBTQ+ individuals from the COVID-19 Disparities Survey distributed between April 16 and May 4, 2020, stratified by WHO region

| Indicator                 | Overall (%) | Africa | Americas | Southeast Asia | Europe | Eastern Mediterranean | Western Pacific | p-value <sup>c</sup> |
|---------------------------|-------------|--------|----------|----------------|--------|-----------------------|-----------------|----------------------|
| Occupation <sup>a,b</sup> | 13115       | 102    | 1262     | 1255           | 9322   | 533                   | 641             | 0.000*               |

|                                    |       |              |               |            |                |           |              |        |
|------------------------------------|-------|--------------|---------------|------------|----------------|-----------|--------------|--------|
| Services and sales                 |       | 19           | 253           | 243        | 1874           | 69        | 165          |        |
| Skilled agriculture                |       | 3            | 8             | 35         | 117            | 11        | 9            |        |
| Crafts                             |       | 7            | 21            | 35         | 232            | 21        | 12           |        |
| Manufacturing plant                |       | 6            | 20            | 66         | 471            | 23        | 36           |        |
| Domestic Work                      |       | 11           | 17            | 19         | 79             | 7         | 10           |        |
| Informal                           |       | 6            | 39            | 26         | 334            | 8         | 9            |        |
| Underground                        |       | 5            | 8             | 4          | 32             | 4         | 2            |        |
| Hospitality                        |       | 6            | 44            | 82         | 320            | 23        | 31           |        |
| Professional                       |       | 23           | 438           | 147        | 2042           | 109       | 136          |        |
| Artistic                           |       | 7            | 91            | 36         | 650            | 28        | 23           |        |
| Armed Forced                       |       | 4            | 8             | 8          | 97             | 21        | 17           |        |
| Freelance                          |       | 6            | 105           | 103        | 283            | 53        | 33           |        |
| Unemployed                         |       | 13           | 129           | 97         | 1113           | 64        | 47           |        |
| Other                              |       | 17           | 193           | 208        | 1264           | 61        | 78           | 0.08   |
| Not applicable                     |       | 20           | 123           | 79         | 889            | 38        | 61           |        |
|                                    |       |              |               |            |                |           |              |        |
| Afford to miss work <sup>a,b</sup> | 11805 | 89           | 920           | 1030       | 8478           | 421       | 562          | 0.000* |
| I already lost my job              |       | 10<br>(11.2) | 98 (8.0)      | 168 (16.3) | 846<br>(10.0)  | 51 (12.1) | 41 (7.3)     |        |
| I am on paid leave                 |       | 3 (3.4)      | 81 (6.6)      | 61 (5.9)   | 605<br>(7.1)   | 19 (4.5)  | 25 (4.4)     |        |
| I telecommute (work from home)     |       | 13<br>(14.6) | 342<br>(27.8) | 166 (16.1) | 1950<br>(23.0) | 55 (13.1) | 72<br>(12.8) |        |
| I was not working before COVID-19  |       | 11<br>(12.4) | 104 (8.5)     | 77 (7.5)   | 733<br>(8.6)   | 43 (10.2) | 39 (7.0)     |        |

|                                                                               |                 |              |                |               |                |            |               |             |
|-------------------------------------------------------------------------------|-----------------|--------------|----------------|---------------|----------------|------------|---------------|-------------|
| No, but I am following the confinement measure                                |                 | 22<br>(24.7) | 258<br>(21.0)  | 182 (17.7)    | 1894<br>(22.3) | 110 (26.1) | 146<br>(26.0) |             |
| No, I need to work to survive and cannot stay at home, regardless of COVID-19 |                 | 10<br>(11.2) | 129<br>(10.5)  | 285 (27.7)    | 1211<br>(27.7) | 82 (19.5)  | 129<br>(23.0) |             |
| Not applicable                                                                |                 | 20<br>(22.5) | 218<br>(17.7)  | 91 (8.8)      | 1239<br>(8.8)  | 61 (14.5)  | 110<br>(19.6) |             |
|                                                                               |                 |              |                |               |                |            |               |             |
| Lost job due to COVID <sup>b</sup>                                            | 11827           | 88           | 1225           | 1032          | 8499           | 420        | 563           | 0.297       |
| Yes                                                                           | 1625<br>(13.7)  | 74<br>(15.9) | 1071<br>(87.4) | 187<br>(18.1) | 1164<br>(13.7) | 65 (15.5)  | 41<br>(7.23)  |             |
| No                                                                            | 10197<br>(86.3) | 14<br>(84.1) | 154<br>(12.6)  | 845<br>(81.9) | 7335<br>(86.3) | 355 (84.5) | 522<br>(92.3) |             |
|                                                                               |                 |              |                |               |                |            |               |             |
| Meet basic needs <sup>b</sup>                                                 | 11821           | 90           | 1229           | 1029          | 8496           | 417        | 560           | 0.000*<br>* |
| Not at all                                                                    | 497<br>(4.2)    | 5<br>(5.6)   | 37 (3.0)       | 38 (3.7)      | 352<br>(4.1)   | 32 (7.7)   | 33 (5.9)      |             |
| Slightly                                                                      | 1699<br>(14.4)  | 19<br>(21.1) | 86 (7.0)       | 148<br>(14.4) | 1309<br>(15.4) | 86 (20.6)  | 51 (9.1)      |             |
| Somewhat                                                                      | 2995<br>(25.3)  | 21<br>(23.3) | 228<br>(18.5)  | 213<br>(20.7) | 2249<br>(26.5) | 95 (22.8)  | 189<br>(3.8)  |             |
| Fairly Well                                                                   | 4037<br>(34.2)  | 25<br>(27.8) | 425<br>(34.6)  | 346<br>(33.6) | 2975<br>(35.0) | 114 (27.3) | 152<br>(27.1) |             |
| Very well                                                                     | 2593<br>(21.9)  | 20<br>(22.2) | 453<br>(36.9)  | 284<br>(27.6) | 1611<br>(19.0) | 90 (21.6)  | 135<br>(24.1) |             |
|                                                                               |                 |              |                |               |                |            |               |             |
| Skipped meals <sup>b</sup>                                                    | 11828           | 89           | 1222           | 1035          | 8505           | 422        | 555           | 0.136       |
| I don't know                                                                  | 565<br>(4.8)    | 5 (5.6)      | 33 (2.7)       | 50 (4.8)      | 407<br>(4.8)   | 44 (10.4)  | 26 (4.7)      |             |
| No                                                                            | 8578            | 47           | 987            | 589 (56.9)    | 6313           | 227 (53.8) | 415           | 0.39        |

|                               |                |              |               |            |                |            |               |             |
|-------------------------------|----------------|--------------|---------------|------------|----------------|------------|---------------|-------------|
|                               | (72.5)         | (52.8)       | (80.8)        |            | (74.2)         |            | (74.8)        |             |
| Yes                           | 2685<br>(22.7) | 37<br>(41.6) | 202<br>(16.5) | 396 (38.3) | 1785<br>(21.0) | 151 (35.8) | 114<br>(20.5) |             |
|                               |                |              |               |            |                |            |               |             |
| Income Reduction <sup>b</sup> | 11692          | 86           | 1219          | 1030       | 8395           | 407        | 555           | 0.000*<br>* |
| 0%                            | 3691<br>(31.6) | 24<br>(27.9) | 378<br>(31.0) | 188 (18.2) | 2813<br>(33.5) | 106 (26.2) | 182<br>(32.8) |             |
| 1-29%                         | 2854<br>(24.4) | 11<br>(12.8) | 264<br>(21.7) | 260 (25.2) | 2045<br>(24.3) | 86 (21.1)  | 188<br>(33.9) |             |
| 30-59%                        | 2479<br>(21.2) | 22<br>(25.6) | 309<br>(25.3) | 233 (22.6) | 1703<br>(20.2) | 105 (25.7) | 107<br>(19.3) |             |
| 60-100%                       | 2668<br>(22.8) | 29<br>(33.7) | 268<br>(22.0) | 349 (34.0) | 1834<br>(22.0) | 110 (27.0) | 78<br>(14.0)  |             |
|                               |                |              |               |            |                |            |               |             |
| Receive Benefits <sup>b</sup> | 9610           | 76           | 1095          | 863        | 6759           | 322        | 495           | 0.01*       |
| No, but it is needed          | 4808<br>(50.0) | 41<br>(54.0) | 403<br>(36.8) | 423 (49.0) | 3531<br>(52.2) | 181 (56.2) | 229<br>(46.3) |             |
| No, it isn't needed           | 3121<br>(32.5) | 20<br>(26.3) | 447<br>(40.8) | 148 (17.1) | 2263<br>(33.5) | 88 (27.3)  | 155<br>(31.1) |             |
| Yes, but it isn't needed      | 280<br>(2.9)   | 0<br>(0.0)   | 36 (3.3)      | 17 (2.0)   | 189<br>(2.8)   | 13 (4.1)   | 25 (5.0)      |             |
| Yes, it is needed             | 1401<br>(14.6) | 15<br>(19.7) | 209<br>(19.1) | 275 (31.9) | 776<br>(11.5)  | 40 (12.4)  | 86<br>(17.6)  |             |

<sup>a</sup>Question was select all that apply and were calculated by overall regional count

<sup>b</sup> Denominators excluded individuals who did not respond

<sup>c</sup> p-values were calculated using a one-way analysis of variance (ANOVA) between WHO regions

\* Denotes p-value <0.05

\*\* Denotes p-value <0.001

### Access to Care

There are existing gaps in care for LGBTQ+ individuals, with many being underinsured or lacking insurance entirely. [37–42] Those living in countries without a nationalized health program are left at increased risk for both economic and health-related despair. The high cost of health services that are required when someone becomes infected with COVID-19 further adds to this already heavy burden.[43–47] A majority of individuals indicated that they had access (84.8%) that they had access to masks (Table 3). 4486 (37.9%) individuals reported having



357 government insurance, 1866 (15.8%) no insurance, and 5475 (46.3%) having insurance from  
 358 private/employer/other. The differences in insurance between regions was statistically significant  
 359 ( $F(5,12)=9.607$ ,  $p=0.0007$ ). One-quarter of individuals indicated that they may lose insurance,  
 360 and the differences in expecting to lose insurance between regions was also significant according  
 361 to a one-way ANOVA ( $F(4,20)=4.540$ ,  $p=0.009$ ). Access to HIV prevention methods (testing,  
 362 condoms, PrEP, PEP) has also become more difficult because of the pandemic (Figure 2).

363  
 364 Table 4: Access to Care indicators among LGBTQ+ individuals from the COVID-19 Disparities Survey  
 365 distributed between April 16 and May 4, 2020, stratified by WHO region

| Indicator                    | Overall (%)     | Africa       | Americas       | Southeast Asia | Europe         | Eastern Mediterranean | Western Pacific | p-value <sup>c</sup> |
|------------------------------|-----------------|--------------|----------------|----------------|----------------|-----------------------|-----------------|----------------------|
| Access to masks <sup>b</sup> | 12508           | 97           | 1296           | 1106           | 8976           | 444                   | 589             | 0.176                |
| Yes                          | 10301<br>(82.4) | 80<br>(82.5) | 1089<br>(84.0) | 1046<br>(95.0) | 7171<br>(79.9) | 371 (83.6)            | 544<br>(92.0)   |                      |
| No                           | 2207<br>(17.6)  | 17<br>(17.5) | 207<br>(16.0)  | 60 (5.0)       | 1805<br>(20.1) | 73 (16.4)             | 47<br>(8.0)     |                      |
| Healthcare coverage          | 11827           | 89           | 1232           | 1030           | 8492           | 423                   | 561             | 0.000*<br>*          |
| Government insurance         | 4486<br>(37.9)  | 18<br>(20.2) | 385<br>(31.2)  | 209<br>(20.3)  | 3442<br>(40.5) | 111 (26.2)            | 321<br>(57.2)   |                      |
| No insurance                 | 1866<br>(15.8)  | 33<br>(37.1) | 203<br>(16.5)  | 272<br>(26.4)  | 1192<br>(14.0) | 122 (28.8)            | 44 (7.8)        |                      |
| Private/employer/other       | 5475<br>(46.3)  | 38<br>(42.7) | 644<br>(52.3)  | 549<br>(53.3)  | 3858<br>(45.5) | 190 (44.9)            | 196<br>(35.0)   |                      |
| Lose Insurance <sup>b</sup>  | 8902            | 50           | 996            | 681            | 6403           | 266                   | 506             | 0.005*               |
| Definitely yes               | 327<br>(3.6)    | 0<br>(0.0)   | 28 (2.8)       | 67 (2.8)       | 181<br>(13.8)  | 20 (7.5)              | 31<br>(6.1)     |                      |
| Probably yes                 | 497<br>(5.7)    | 5<br>(10.0)  | 72 (7.2)       | 83 (7.2)       | 268<br>(4.2)   | 24 (9.0)              | 45<br>(9.0)     |                      |
| Might or might not           | 1378<br>(15.5)  | 15<br>(30.0) | 170<br>(17.1)  | 134<br>(17.1)  | 889<br>(13.9)  | 60 (22.6)             | 110<br>(21.7)   |                      |

|                |                |              |               |               |                |           |               |        |
|----------------|----------------|--------------|---------------|---------------|----------------|-----------|---------------|--------|
|                |                | )            |               |               |                |           |               |        |
| Probably not   | 2511<br>(28.2) | 10<br>(20.0) | 299<br>(30.0) | 160<br>(30.0) | 1867<br>(29.2) | 67 (52.2) | 108<br>(21.3) | 0.000* |
| Definitely not | 4189<br>(47.0) | 20<br>(40.0) | 427<br>(42.9) | 237<br>(42.9) | 3198<br>(49.9) | 95 (35.1) | 212<br>(41.9) |        |

<sup>a</sup>Question was select all that apply and were calculated by overall regional count

<sup>b</sup> Denominators excluded individuals who did not respond

<sup>c</sup> p-values were calculated using a one-way analysis of variance (ANOVA) between WHO regions

\* Denotes p-value <0.05

\*\* Denotes p-value <0.001

### Discussion:

COVID-19 has rapidly emerged as a major public health threat, causing significant global disruption. Growing evidence indicates that the incidence of COVID-19 is higher in communities of lower socioeconomic status, in which LGBTQ+ individuals are over-represented given their long history of economic marginalization.[48–51] Additionally, higher burdens of mental health and infectious diseases -- due to the intersection of upstream determinants such as stigma, criminalization of same-sex practices and sex work, and continued limited investment in these communities -- place LGBTQ+ individuals at even higher risk. [2,13,16] Such compounding vulnerabilities result in earlier disruptions to health services, leading to prolonged periods without access to care, especially during global crises.[31] These impacts are felt more strongly among those further marginalized by society, such as sex workers, racial/ethnic minorities, immigrants, and those lacking access to healthcare. These realities will undoubtedly reinforce the intersectional vulnerabilities that existed before the COVID-19 pandemic.

This descriptive analysis highlights the severe impacts to mental health, access to care, and socioeconomics that members of the LGBTQ+ community are experiencing. Be it the nearly one-quarter of individuals experiencing food insecurity, or the one-half of individuals who have yet to receive financial benefits, despite need. The inability to meet basic needs will likely be exacerbated further for individuals who are unemployed or working in industries most directly impacted by COVID-19. [52] Even among those who have remained employed during the pandemic, reductions in income will likely put additional strain on individuals during an already difficult period.

While most individuals who participated in the survey reported having access to masks, at least one in 5 of individuals were unsure if they would continue to have insurance. Condoms as a means of HIV prevention remained largely accessible despite the pandemic, while at-home HIV testing, PrEP, and PEP were the prevention methods that were most difficult to access during the COVID-19 crisis. This is particularly alarming because members of the LGBTQ+ continue to be disproportionately impacted by HIV globally [20], so these disparities in access to prevention strategies may lead to heightened vulnerability to HIV, especially among minorities, immigrants, and others who may have been forced to engage in sex work due to the pandemic. [53–56] This also has major implications for rates of HIV transmission throughout the duration of the crisis,

402 where changes in income and employment have been shown to increase HIV risk. [57,58]  
403 Furthermore, while this analysis did not examine the impact of COVID-19 on those living with  
404 HIV, it's been shown that interruptions to the HIV care continuum may have impacts on  
405 community transmission, treatment, and mortality. [59–62] Unless efforts are undertaken to  
406 address these disparities in access to methods of prevention, decades of progress may be lost.

407 Given the wide variation in health care coverage around the world, it should not be forgotten that  
408 the 1 in 6 individuals who indicated having no insurance at all. This is of particular importance  
409 within the context of the fifty percent of individuals who reported to having moderate and severe  
410 psychological distress, as well as those who screened positive for anxiety and/or depression.  
411 While there has been a large international focus on the clinical manifestations and treatment for  
412 COVID-19, it is worth noting that there is likely an even bigger crisis brewing just under the  
413 surface as people continue to experience the psychological distress associated with the response  
414 to COVID-19, and our data indicate that members of the LGBTQ+ are no different. With efforts  
415 to mitigate this growing mental health crisis, there is a continued need to not only characterize its  
416 parameters, but targeted solutions implemented with the utmost urgency.

417 These findings highlight important considerations in the wake of this pandemic. It is evident that  
418 there is a growing need to mitigate the impacts of this crisis by circumventing traditional models  
419 of care to ensure continuity and achieve long-term health outcomes. Telemedicine continues to  
420 show promise as a way to ensure individuals have continued care, allowing for patient-provider  
421 interactions while minimizing the risk of new COVID-19 transmission events. [63–66]  
422 Additionally, mobile health (mHealth) strategies will become even more important to keep in  
423 touch and regularly check-in with patients now that in-person contact is largely discouraged.  
424 [67,68] While access to in-person HIV testing remains moderately accessible according to our  
425 analysis, moving forward it will be crucial to implement strategies that limit the need to travel  
426 and possible interactions with the general public, such as delivery of at-home testing kits, drop-  
427 off testing, or even mobile testing. Even if improvements in the use of technology for care  
428 continue, without addressing the digital divide that persists in many communities the world, it is  
429 likely that the most vulnerable among us will remain increasingly vulnerable and may even  
430 further exacerbate existing disparities. [69–71] Additionally, these findings indicate the need to  
431 develop more robust and targeted approaches for regional differences and sub-populations.  
432 Economic support, HIV prevention, and mental health services will remain pivotal moving  
433 forward, and while targeted and tailored, individual-level interventions are necessary, they will  
434 likely not be enough. Structural and policy changes which prioritize public health and address  
435 the systemic barriers that individuals in this community continue to face are necessary to ensure  
436 economic and health equity long-term.

437 For countries where there is higher acceptability of LGBTQ+ people, this may begin with  
438 disaggregating data by sexual orientation and gender identity at the local, sub-national, and  
439 national levels. In many countries around the world, no data is collected on these communities,  
440 and short of researchers using novel methods to estimate population size these individuals would  
441 otherwise, “not count”. [72,73] For countries with less favorable views, it will require  
442 recognition of this community, eliminating criminalizing policies on same-sex behavior and sex  
443 work, extending the right to marry for same-sex couples, and establishing laws that bestow legal  
444 protection to members of this marginalized community throughout society. [13,74,75]

1  
2  
3 445 Notably, there are some limitations of this study. Individuals must be users of Hornet in order to  
4 446 participate in the survey, and thus must have internet and smartphone access, limiting  
5 447 generalizability of the findings to a target population of interest. Additionally, emerging evidence  
6 448 indicates that COVID-19 is having a larger impact on those of lower socioeconomic status (i.e.  
7 449 without internet or smartphone access); therefore it is possible that this underestimates the true  
8 450 magnitude of the pandemic on more marginalized individuals in these communities. Even so,  
9 451 prior studies have documented the success of using social networking platforms to reach hidden  
10 452 and stigmatized populations. It is also possible that barriers such as language or stigma, led  
11 453 particular subgroups to not participate or complete the survey in its entirety, resulting in non-  
12 454 response bias. To mitigate this, we plan to translate later iterations of the study into additional  
13 455 languages. Meaning that further studies, including but not limited to qualitative interviews, will  
14 456 be required to characterize the impact of the COVID-19 crisis further. As well, this is a  
15 457 convenience sample and cross-sectional in nature, so may not be representative of the whole  
16 458 LGBTQ+ community and precludes our ability to examine temporality in the outcomes we  
17 459 analyzed.

21 460 Despite these limitations, the novel use of a rapid survey among users of a social network  
22 461 application provides insight into the effects felt by the LGBTQ+ community in real-time, when it  
23 462 may otherwise be infeasible to collect such information at scale. Collectively, these results  
24 463 reflect the impact that the pandemic will have on the LGBTQ+ community, and the need for  
25 464 continued monitoring and policy action as the COVID-19 crisis progresses.

#### 28 465 Conclusion:

30 466 These findings represent individuals from 136 countries around the world and highlight the clear  
31 467 immediate and secondary effects of COVID-19 on LGBTQ+ communities, while emphasizing  
32 468 the need for additional data to guide future programs and policies. If not for surveys of this kind,  
33 469 which leverages a global social network and app-based technology, we would be unable to  
34 470 obtain this quantity of accurate, and real-time information on how marginalized communities are  
35 471 being impacted by the pandemic, nor at this level of granularity. This novel, technology-based  
36 472 approach highlights the profoundly detrimental impact that COVID-19 is having and will  
37 473 continue to have on LGBTQ+ communities, thereby underscoring the need for a data-driven and  
38 474 timely response, both immediately and in the wake of this crisis.

42 475

44 476

46 477

48 478

50 479

52 480

54 481

482

483

484

485 References

486 1 Dong E, Du H, Gardner L. An interactive web-based dashboard to track COVID-19 in real  
487 time. *The Lancet Infectious Diseases* 2020;**20**:533–4. doi:10.1016/S1473-3099(20)30120-1

488 2 Santos G-M, Ackerman B, Rao A, *et al*. Economic, Mental Health, HIV Prevention and HIV  
489 Treatment Impacts of COVID-19 and the COVID-19 Response on a Global Sample of  
490 Cisgender Gay Men and Other Men Who Have Sex with Men. *AIDS Behav* 2020;:1–11.  
491 doi:10.1007/s10461-020-02969-0

492 3 Jarrett BA, Peitzmeier SM, Restar A, *et al*. Gender-affirming care, mental health, and  
493 economic stability in the time of COVID-19: a global cross-sectional study of transgender  
494 and non-binary people. *medRxiv* 2020;:2020.11.02.20224709.  
495 doi:10.1101/2020.11.02.20224709

496 4 Hall KS, Samari G, Garbers S, *et al*. Centring sexual and reproductive health and justice in  
497 the global COVID-19 response. *The Lancet* 2020;**395**:1175–7. doi:10.1016/S0140-  
498 6736(20)30801-1

499 5 Thomas Hale, Samuel Webster. Oxford COVID-19 Government Response Tracker.  
500 Published Online First: 2020.https://apo.org.au/node/303043

501 6 DeMulder J, Kraus-Perrotta C, Zaidi H. Sexual and gender minority adolescents must be  
502 prioritised during the global COVID-19 public health response. *null* 2020;**28**:1804717.  
503 doi:10.1080/26410397.2020.1804717

504 7 Kawohl W, Nordt C. COVID-19, unemployment, and suicide. *The Lancet Psychiatry*  
505 2020;**7**:389–90. doi:10.1016/S2215-0366(20)30141-3

506 8 Jiang H, Zhou Y, Tang W. Maintaining HIV care during the COVID-19 pandemic. *The*  
507 *Lancet HIV* 2020;**7**:e308–9. doi:10.1016/S2352-3018(20)30105-3

508 9 Poteat TC, Reisner SL, Miller M, *et al*. COVID-19 Vulnerability of Transgender Women With  
509 and Without HIV Infection in the Eastern and Southern U.S. *medRxiv*  
510 2020;:2020.07.21.20159327. doi:10.1101/2020.07.21.20159327

511 10 Barnert E, Ahalt C, Williams B. Prisons: Amplifiers of the COVID-19 Pandemic Hiding in  
512 Plain Sight. *Am J Public Health* 2020;**110**:964–6. doi:10.2105/AJPH.2020.305713

513 11 Koh D. Migrant workers and COVID-19. *Occup Environ Med* 2020;**77**:634.  
514 doi:10.1136/oemed-2020-106626

515 12 Kline NS. Rethinking COVID-19 Vulnerability: A Call for LGBTQ+ Im/migrant Health Equity  
516 in the United States During and After a Pandemic. *Health Equity* 2020;**4**:239–42.  
517 doi:10.1089/heq.2020.0012

- 1  
2  
3 518 13 Wallach S, Garner A, Howell S, *et al.* Address Exacerbated Health Disparities and Risks to  
4 519 LGBTQ+ Individuals during COVID-19. *Health Hum Rights* 2020;**22**:313–6.  
5
- 6 520 14 Banerjee D, Rao TSS. Sexuality, sexual well being, and intimacy during COVID-19  
7 521 pandemic: An advocacy perspective. *Indian J Psychiatry* 2020;**62**:418–26.  
8 522 doi:10.4103/psychiatry.IndianJPsychiatry\_484\_20  
9
- 10 523 15 Fraser B, Pierse N, Chisholm E, *et al.* LGBTIQ+ Homelessness: A Review of the Literature.  
11 524 *Int J Environ Res Public Health* 2019;**16**:2677. doi:10.3390/ijerph16152677  
12
- 13 525 16 Hutchcraft ML, Teferra AA, Montemorano L, *et al.* Differences in Health-Related Quality of  
14 526 Life and Health Behaviors Among Lesbian, Bisexual, and Heterosexual Women Surviving  
15 527 Cancer from the 2013 to 2018 National Health Interview Survey. *LGBT Health* 2021;**8**:68–  
16 528 78. doi:10.1089/lgbt.2020.0185  
17
- 18 529 17 Raifman J, Bor J, Venkataramani A. Unemployment insurance and food insecurity among  
19 530 people who lost employment in the wake of COVID-19. *medRxiv*  
20 531 2020;:2020.07.28.20163618. doi:10.1101/2020.07.28.20163618  
21 531  
22
- 23 532 18 Salerno JP, Williams ND, Gattamorta KA. LGBTQ populations: Psychologically vulnerable  
24 533 communities in the COVID-19 pandemic. *Psychological Trauma: Theory, Research,*  
25 534 *Practice, and Policy* 2020;**12**:S239–42. doi:10.1037/tra0000837  
26
- 27 535 19 Hogan AB, Jewell BL, Sherrard-Smith E, *et al.* Potential impact of the COVID-19 pandemic  
28 536 on HIV, tuberculosis, and malaria in low-income and middle-income countries: a modelling  
29 537 study. *The Lancet Global Health* 2020;**8**:e1132–41. doi:10.1016/S2214-109X(20)30288-6  
30
- 31 538 20 UNAIDS data 2019. 2019. [https://www.unaids.org/en/resources/documents/2019/2019-](https://www.unaids.org/en/resources/documents/2019/2019-UNAIDS-data)  
32 539 [UNAIDS-data](https://www.unaids.org/en/resources/documents/2019/2019-UNAIDS-data) (accessed 1 Feb 2021).  
33
- 34 540 21 Jewell BL, Mudimu E, Stover J, *et al.* Potential effects of disruption to HIV programmes in  
35 541 sub-Saharan Africa caused by COVID-19: results from multiple mathematical models.  
36 542 *Lancet HIV* 2020;**7**:e629–40. doi:10.1016/S2352-3018(20)30211-3  
37
- 38 543 22 The Lancet Hiv. When pandemics collide. *Lancet HIV* 2020;**7**:e301–e301.  
39 544 doi:10.1016/S2352-3018(20)30113-2  
40
- 41 545 23 Logie CH, Lacombe-Duncan A, Brien N, *et al.* Barriers and facilitators to HIV testing among  
42 546 young men who have sex with men and transgender women in Kingston, Jamaica: a  
43 547 qualitative study. *J Int AIDS Soc* 2017;**20**:21385–21385. doi:10.7448/IAS.20.1.21385  
44 547  
45
- 46 548 24 Agénor M, Pérez AE, Koma JW, *et al.* Sexual Orientation Identity, Race/Ethnicity, and  
47 549 Lifetime HIV Testing in a National Probability Sample of U.S. Women and Men: An  
48 550 Intersectional Approach. *LGBT Health* 2019;**6**:306–18. doi:10.1089/lgbt.2019.0001  
49
- 50 551 25 Rael CT, Martinez M, Giguere R, *et al.* Barriers and Facilitators to Oral PrEP Use Among  
51 552 Transgender Women in New York City. *AIDS Behav* 2018;**22**:3627–36.  
52 553 doi:10.1007/s10461-018-2102-9  
53
- 54 554 26 Duffus WA, Davis HT, Byrd MD, *et al.* HIV Testing in Women: Missed Opportunities. *Journal*  
55 555 *of Women's Health* 2011;**21**:170–8. doi:10.1089/jwh.2010.2655  
56  
57  
58  
59  
60

- 1  
2  
3 556 27 Schweighardt B, Ortiz GM, Grant RM, *et al.* Emergence of drug-resistant HIV-1 variants in  
4 557 patients undergoing structured treatment interruptions. *AIDS*  
5 558 2002;**16**.[https://journals.lww.com/aidsonline/Fulltext/2002/11220/Emergence\\_of\\_drug\\_resist](https://journals.lww.com/aidsonline/Fulltext/2002/11220/Emergence_of_drug_resistant_HIV_1_variants_in.18.aspx)  
6 559 [ant\\_HIV\\_1\\_variants\\_in.18.aspx](https://journals.lww.com/aidsonline/Fulltext/2002/11220/Emergence_of_drug_resistant_HIV_1_variants_in.18.aspx)  
7  
8 560 28 Cohen MS, Chen YQ, McCauley M, *et al.* Antiretroviral Therapy for the Prevention of HIV-1  
9 561 Transmission. *N Engl J Med* 2016;**375**:830–9. doi:10.1056/NEJMoa1600693  
10  
11 562 29 =Strategies for Management of Antiretroviral Therapy (SMART) Study Group, El-Sadr W,  
12 563 Lundgren JD, *et al.* CD4+ count-guided interruption of antiretroviral treatment. *The New*  
13 564 *England journal of medicine* 2006;**355**:2283–96. doi:10.1056/nejmoa062360  
14  
15 565 30 Kroenke K, Spitzer RL, Williams JBW, *et al.* An Ultra-Brief Screening Scale for Anxiety and  
16 566 Depression: The PHQ–4. *Psychosomatics* 2009;**50**:613–21. doi:10.1016/S0033-  
17 567 3182(09)70864-3  
18  
19 568 31 Fredriksen-Goldsen KI, Simoni JM, Kim H-J, *et al.* The health equity promotion model:  
20 569 Reconceptualization of lesbian, gay, bisexual, and transgender (LGBT) health disparities.  
21 570 *Am J Orthopsychiatry* 2014;**84**:653–63. doi:10.1037/ort0000030  
22  
23 571 32 Bockting WO, Miner MH, Swinburne Romine RE, *et al.* Stigma, mental health, and resilience  
24 572 in an online sample of the US transgender population. *Am J Public Health* 2013;**103**:943–  
25 573 51. doi:10.2105/AJPH.2013.301241  
26  
27 574 33 Feinstein BA, Goldfried MR, Davila J. The relationship between experiences of  
28 575 discrimination and mental health among lesbians and gay men: An examination of  
29 576 internalized homonegativity and rejection sensitivity as potential mechanisms. *Journal of*  
30 577 *Consulting and Clinical Psychology* 2012;**80**:917–27. doi:10.1037/a0029425  
31  
32 578 34 Balsam KF, Molina Y, Beadnell B, *et al.* Measuring multiple minority stress: the LGBT  
33 579 People of Color Microaggressions Scale. *Cultur Divers Ethnic Minor Psychol* 2011;**17**:163–  
34 580 74. doi:10.1037/a0023244  
35  
36 581 35 Fredriksen-Goldsen KI, Emlert CA, Kim H-J, *et al.* The physical and mental health of lesbian,  
37 582 gay male, and bisexual (LGB) older adults: the role of key health indicators and risk and  
38 583 protective factors. *Gerontologist* 2013;**53**:664–75. doi:10.1093/geront/gns123  
39  
40 584 36 The Economic Impact of COVID-19 on the LGBTQ Community. HRC.  
41 585 <https://www.hrc.org/resources/the-economic-impact-of-covid-19-on-the-lgbtq-community>  
42 586 (accessed 4 Feb 2021).  
43  
44 587 37 Dahlhamer JM, Galinsky AM, Joestl SS, *et al.* Barriers to Health Care Among Adults  
45 588 Identifying as Sexual Minorities: A US National Study. *Am J Public Health* 2016;**106**:1116–  
46 589 22. doi:10.2105/AJPH.2016.303049  
47  
48 590 38 Buchmueller T, Carpenter CS. Disparities in health insurance coverage, access, and  
49 591 outcomes for individuals in same-sex versus different-sex relationships, 2000–2007. *Am J*  
50 592 *Public Health* 2010;**100**:489–95. doi:10.2105/AJPH.2009.160804  
51  
52  
53  
54  
55  
56  
57  
58  
59  
60

- 1  
2  
3 593 39 Radix A, Maingi S. LGBT Cultural Competence and Interventions to Help Oncology Nurses  
4 594 and Other Health Care Providers. *Seminars in Oncology Nursing* 2018;**34**:80–9.  
5 595 doi:10.1016/j.soncn.2017.12.005  
6  
7 596 40 Macapagal K, Bhatia R, Greene GJ. Differences in Healthcare Access, Use, and  
8 597 Experiences Within a Community Sample of Racially Diverse Lesbian, Gay, Bisexual,  
9 598 Transgender, and Questioning Emerging Adults. *LGBT Health* 2016;**3**:434–42.  
10 599 doi:10.1089/lgbt.2015.0124  
11  
12 600 41 Qureshi RI, Zha P, Kim S, *et al.* Health Care Needs and Care Utilization Among Lesbian,  
13 601 Gay, Bisexual, and Transgender Populations in New Jersey. *null* 2018;**65**:167–80.  
14 602 doi:10.1080/00918369.2017.1311555  
15  
16 603 42 Injustice at Every Turn: A Report of the National Transgender Discrimination Survey.  
17 604 National LGBTQ Task Force. 2011.[https://www.thetaskforce.org/injustice-every-turn-report-](https://www.thetaskforce.org/injustice-every-turn-report-national-transgender-discrimination-survey/)  
18 605 [national-transgender-discrimination-survey/](https://www.thetaskforce.org/injustice-every-turn-report-national-transgender-discrimination-survey/) (accessed 4 Feb 2021).  
19  
20 606 43 Yamin M. Counting the cost of COVID-19. *Int J Inf Technol* 2020;:1–7. doi:10.1007/s41870-  
21 607 020-00466-0  
22  
23 608 44 Bartsch SM, Ferguson MC, McKinnell JA, *et al.* The Potential Health Care Costs And  
24 609 Resource Use Associated With COVID-19 In The United States. *Health Affairs*  
25 610 2020;**39**:927–35. doi:10.1377/hlthaff.2020.00426  
26  
27 611 45 Liu Y, Lee JM, Lee C. The challenges and opportunities of a global health crisis: the  
28 612 management and business implications of COVID-19 from an Asian perspective. *Asian*  
29 613 *Business & Management* 2020;:1–21. doi:10.1057/s41291-020-00119-x  
30  
31 614 46 Khan JR, Awan N, Islam MM, *et al.* Healthcare Capacity, Health Expenditure, and Civil  
32 615 Society as Predictors of COVID-19 Case Fatalities: A Global Analysis. *Front Public Health*  
33 616 2020;**8**:347–347. doi:10.3389/fpubh.2020.00347  
34  
35 617 47 Tan-Torres Edejer T, Hanssen O, Mirelman A, *et al.* Projected health-care resource needs  
36 618 for an effective response to COVID-19 in 73 low-income and middle-income countries: a  
37 619 modelling study. *The Lancet Global Health* 2020;**8**:e1372–9. doi:10.1016/S2214-  
38 620 109X(20)30383-1  
39  
40 621 48 Emllet CA. Social, Economic, and Health Disparities Among LGBT Older Adults.  
41 622 *Generations* 2016;**40**:16–22.  
42  
43 623 49 Patel JA, Nielsen FBH, Badiani AA, *et al.* Poverty, inequality and COVID-19: the forgotten  
44 624 vulnerable. *Public Health* 2020;**183**:110–1. doi:10.1016/j.puhe.2020.05.006  
45  
46 625 50 Corburn J, Vlahov D, Mberu B, *et al.* Slum Health: Arresting COVID-19 and Improving Well-  
47 626 Being in Urban Informal Settlements. *Journal of Urban Health* 2020;**97**:348–57.  
48 627 doi:10.1007/s11524-020-00438-6  
49  
50 628 51 Abrams EM, Szeffler SJ. COVID-19 and the impact of social determinants of health. *Lancet*  
51 629 *Respir Med* 2020;**8**:659–61. doi:10.1016/S2213-2600(20)30234-4  
52  
53  
54  
55  
56  
57  
58  
59  
60



- 1  
2  
3 630 52 Charlton BM, Gordon AR, Reisner SL, *et al.* Sexual orientation-related disparities in  
4 631 employment, health insurance, healthcare access and health-related quality of life: a cohort  
5 632 study of US male and female adolescents and young adults. *BMJ Open* 2018;**8**:e020418–  
6 633 e020418. doi:10.1136/bmjopen-2017-020418  
7  
8 634 53 Baral SD, Friedman MR, Geibel S, *et al.* Male sex workers: practices, contexts, and  
9 635 vulnerabilities for HIV acquisition and transmission. *Lancet* 2015;**385**:260–73.  
10 636 doi:10.1016/S0140-6736(14)60801-1  
11  
12 637 54 Santos G-M, Makofane K, Arreola S, *et al.* Reductions in access to HIV prevention and care  
13 638 services are associated with arrest and convictions in a global survey of men who have sex  
14 639 with men. *Sex Transm Infect* 2017;**93**:62. doi:10.1136/sextrans-2015-052386  
15  
16 640 55 Santos G-M, Do T, Beck J, *et al.* Syndemic conditions associated with increased HIV risk in  
17 641 a global sample of men who have sex with men. *Sex Transm Infect* 2014;**90**:250.  
18 642 doi:10.1136/sextrans-2013-051318  
19  
20 643 56 Martinez O, Brady KA, Levine E, *et al.* Using Syndemics Theory to Examine HIV Sexual  
21 644 Risk Among Latinx Men Who Have Sex with Men in Philadelphia, PA: Findings from the  
22 645 National HIV Behavioral Surveillance. *EHQUIDAD* 2020;**13**:217–36.  
23 646 doi:10.15257/ehquidad.2020.0009  
24  
25 647 57 Maulsby CH, Ratnayake A, Hesson D, *et al.* A Scoping Review of Employment and HIV.  
26 648 *AIDS Behav* 2020;**24**:2942–55. doi:10.1007/s10461-020-02845-x  
27  
28 649 58 Delpierre C, Cuzin L, Lauwers-Cances V, *et al.* Unemployment as a risk factor for AIDS and  
29 650 death for HIV-infected patients in the era of highly active antiretroviral therapy. *Sex Transm*  
30 651 *Infect* 2008;**84**:183. doi:10.1136/sti.2007.027961  
31  
32 652 59 Chenneville T, Gabbidon K, Hanson P, *et al.* The Impact of COVID-19 on HIV Treatment  
33 653 and Research: A Call to Action. *Int J Environ Res Public Health* 2020;**17**:4548.  
34 654 doi:10.3390/ijerph17124548  
35  
36 655 60 Mitchell KM, Dimitrov D, Silhol R, *et al.* Estimating the potential impact of COVID-19-related  
37 656 disruptions on HIV incidence and mortality among men who have sex with men in the United  
38 657 States: a modelling study. *medRxiv* 2020;:2020.10.30.20222893.  
39 658 doi:10.1101/2020.10.30.20222893  
40  
41 659 61 Pinto RM, Park S. COVID-19 Pandemic Disrupts HIV Continuum of Care and Prevention:  
42 660 Implications for Research and Practice Concerning Community-Based Organizations and  
43 661 Frontline Providers. *AIDS Behav* 2020;:1–4. doi:10.1007/s10461-020-02893-3  
44  
45 662 62 Prabhu S, Poongulali S, Kumarasamy N. Impact of COVID-19 on people living with HIV: A  
46 663 review. *J Virus Erad* 2020;**6**:100019. doi:10.1016/j.jve.2020.100019  
47  
48 664 63 Mgbako O, Miller EH, Santoro AF, *et al.* COVID-19, Telemedicine, and Patient  
49 665 Empowerment in HIV Care and Research. *AIDS Behav* 2020;**24**:1990–3.  
50 666 doi:10.1007/s10461-020-02926-x  
51  
52 667 64 Touger R, Wood BR. A Review of Telehealth Innovations for HIV Pre-Exposure Prophylaxis  
53 668 (PrEP). *Current HIV/AIDS Reports* 2019;**16**:113–9. doi:10.1007/s11904-019-00430-z  
54  
55  
56  
57  
58  
59  
60

- 1  
2  
3 669 65 Rogers BG, Coats CS, Adams E, *et al.* Development of Telemedicine Infrastructure at an  
4 670 LGBTQ+ Clinic to Support HIV Prevention and Care in Response to COVID-19, Providence,  
5 671 RI. *AIDS Behav* 2020;**24**:2743–7. doi:10.1007/s10461-020-02895-1  
6  
7 672 66 Langarizadeh M, Tabatabaei MS, Tavakol K, *et al.* Telemental Health Care, an Effective  
8 673 Alternative to Conventional Mental Care: a Systematic Review. *Acta Inform Med*  
9 674 2017;**25**:240–6. doi:10.5455/aim.2017.25.240-246  
10  
11 675 67 Wong KYK, Stafylis C, Klausner JD. Telemedicine: a solution to disparities in human  
12 676 immunodeficiency virus prevention and pre-exposure prophylaxis uptake, and a framework  
13 677 to scalability and equity. *Mhealth* 2020;**6**:21–21. doi:10.21037/mhealth.2019.12.06  
14  
15 678 68 Catalani C, Philbrick W, Fraser H, *et al.* mHealth for HIV Treatment & Prevention: A  
16 679 Systematic Review of the Literature. *Open AIDS J* 2013;**7**:17–41.  
17 680 doi:10.2174/1874613620130812003  
18  
19 681 69 Blandford A, Wesson J, Amalberti R, *et al.* Opportunities and challenges for telehealth  
20 682 within, and beyond, a pandemic. *The Lancet Global Health* 2020;**8**:e1364–5.  
21 683 doi:10.1016/S2214-109X(20)30362-4  
22  
23 684 70 Campbell BR, Ingersoll KS, Flickinger TE, *et al.* Bridging the digital health divide: toward  
24 685 equitable global access to mobile health interventions for people living with HIV. *null*  
25 686 2019;**17**:141–4. doi:10.1080/14787210.2019.1578649  
26  
27 687 71 Bakhtiar M, Elbuluk N, Lipoff JB. The digital divide: How COVID-19's telemedicine  
28 688 expansion could exacerbate disparities. *J Am Acad Dermatol* 2020;**83**:e345–6.  
29 689 doi:10.1016/j.jaad.2020.07.043  
30  
31 690 72 Baral S, Turner RM, Lyons CE, *et al.* Population Size Estimation of Gay and Bisexual Men  
32 691 and Other Men Who Have Sex With Men Using Social Media-Based Platforms. *JMIR Public*  
33 692 *Health Surveill* 2018;**4**:e15–e15. doi:10.2196/publichealth.9321  
34  
35 693 73 Cahill SR, Makadon HJ. If They Don't Count Us, We Don't Count: Trump Administration  
36 694 Rolls Back Sexual Orientation and Gender Identity Data Collection. *LGBT Health*  
37 695 2017;**4**:171–3. doi:10.1089/lgbt.2017.0073  
38  
39 696 74 Beyrer C. Pushback: the current wave of anti-homosexuality laws and impacts on health.  
40 697 *PLoS Med* 2014;**11**:e1001658–e1001658. doi:10.1371/journal.pmed.1001658  
41  
42 698 75 Marks SM. Global recognition of human rights for lesbian, gay, bisexual, and transgender  
43 699 people. *Health Hum Rights* 2006;**9**:33–42.  
44  
45  
46  
47 700  
48  
49  
50  
51  
52  
53  
54  
55  
56  
57  
58  
59

1  
2  
3  
4  
5  
6  
7  
8  
9  
10  
11  
12  
13  
14  
15  
16  
17  
18  
19  
20  
21  
22  
23  
24  
25  
26  
27  
28  
29  
30  
31  
32  
33  
34  
35  
36  
37  
38  
39  
40  
41  
42  
43  
44  
45  
46  
47



# Whether you need it or not, are you able to access these HIV prevention strategies during the COVID-19 pandemic?

■ Definitely not   
 ■ Probably not   
 ■ Might or might not   
 ■ Probably yes   
 ■ Definitely yes

1  
2  
3  
4  
5  
6  
7  
8  
9  
10  
11  
12  
13  
14  
15  
16  
17  
18  
19  
20  
21  
22  
23  
24  
25  
26  
27  
28  
29  
30  
31  
32  
33  
34  
35  
36  
37  
38  
39  
40  
41  
42  
43  
44  
45  
46  
47

## In-Person HIV Testing

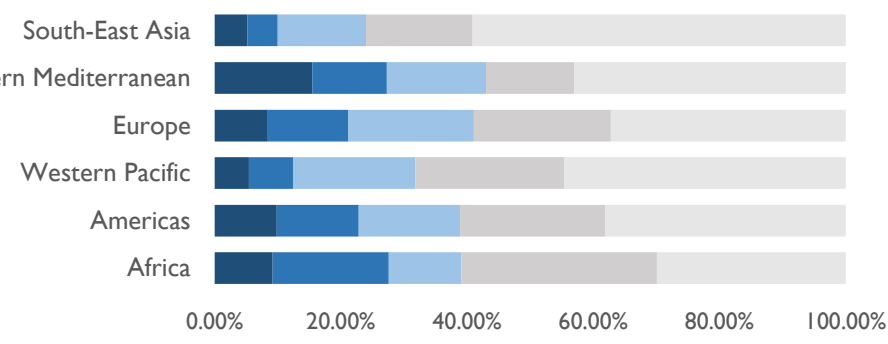

## At-Home HIV Testing

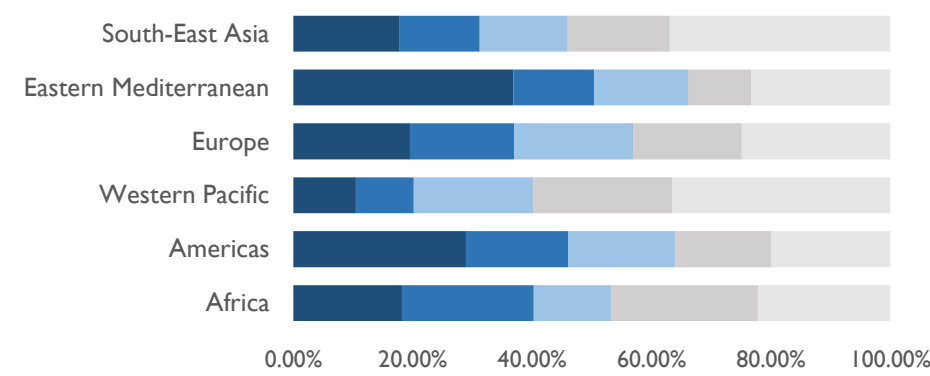

## Condoms

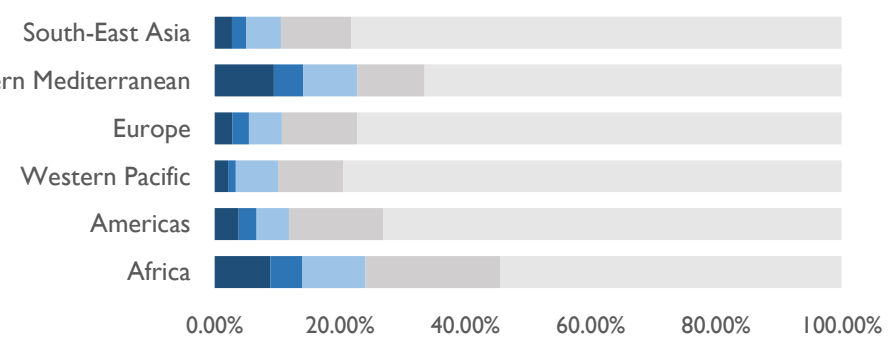

## Post-Exposure Prophylaxis (PEP)

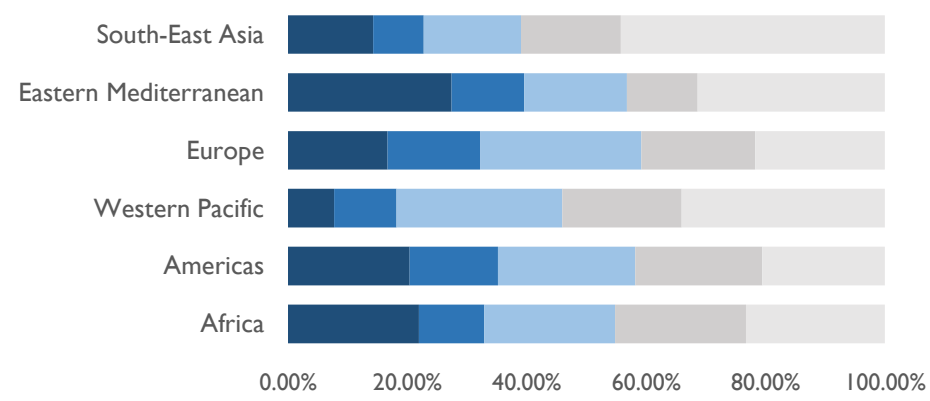

## Pre-Exposure Prophylaxis (PrEP)

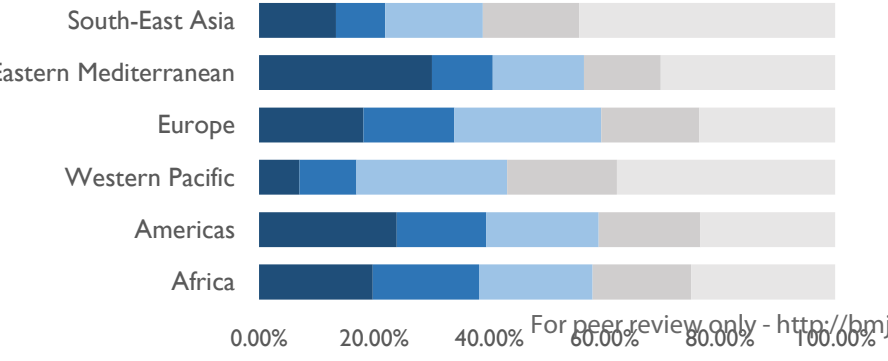

## STROBE Statement—checklist of items that should be included in reports of observational studies

|                              | Item No | Recommendation                                                                                                                                                                                                                                                                                                                                                                                                                                                                                                                                                                                                                                                                                   |
|------------------------------|---------|--------------------------------------------------------------------------------------------------------------------------------------------------------------------------------------------------------------------------------------------------------------------------------------------------------------------------------------------------------------------------------------------------------------------------------------------------------------------------------------------------------------------------------------------------------------------------------------------------------------------------------------------------------------------------------------------------|
| <b>Title and abstract</b>    | 1 ✓     | (a) Indicate the study's design with a commonly used term in the title or the abstract<br>(b) Provide in the abstract an informative and balanced summary of what was done and what was found                                                                                                                                                                                                                                                                                                                                                                                                                                                                                                    |
| <b>Introduction</b>          |         |                                                                                                                                                                                                                                                                                                                                                                                                                                                                                                                                                                                                                                                                                                  |
| Background/rationale         | 2 ✓     | Explain the scientific background and rationale for the investigation being reported                                                                                                                                                                                                                                                                                                                                                                                                                                                                                                                                                                                                             |
| Objectives                   | 3 ✓     | State specific objectives, including any prespecified hypotheses                                                                                                                                                                                                                                                                                                                                                                                                                                                                                                                                                                                                                                 |
| <b>Methods</b>               |         |                                                                                                                                                                                                                                                                                                                                                                                                                                                                                                                                                                                                                                                                                                  |
| Study design                 | 4 ✓     | Present key elements of study design early in the paper                                                                                                                                                                                                                                                                                                                                                                                                                                                                                                                                                                                                                                          |
| Setting                      | 5 ✓     | Describe the setting, locations, and relevant dates, including periods of recruitment, exposure, follow-up, and data collection                                                                                                                                                                                                                                                                                                                                                                                                                                                                                                                                                                  |
| Participants                 | 6 ✓     | (a) <i>Cohort study</i> —Give the eligibility criteria, and the sources and methods of selection of participants. Describe methods of follow-up<br><i>Case-control study</i> —Give the eligibility criteria, and the sources and methods of case ascertainment and control selection. Give the rationale for the choice of cases and controls<br><i>Cross-sectional study</i> —Give the eligibility criteria, and the sources and methods of selection of participants<br>(b) <i>Cohort study</i> —For matched studies, give matching criteria and number of exposed and unexposed<br><i>Case-control study</i> —For matched studies, give matching criteria and the number of controls per case |
| Variables                    | 7 ✓     | Clearly define all outcomes, exposures, predictors, potential confounders, and effect modifiers. Give diagnostic criteria, if applicable                                                                                                                                                                                                                                                                                                                                                                                                                                                                                                                                                         |
| Data sources/<br>measurement | 8* ✓    | For each variable of interest, give sources of data and details of methods of assessment (measurement). Describe comparability of assessment methods if there is more than one group                                                                                                                                                                                                                                                                                                                                                                                                                                                                                                             |
| Bias                         | 9 ✓     | Describe any efforts to address potential sources of bias                                                                                                                                                                                                                                                                                                                                                                                                                                                                                                                                                                                                                                        |
| Study size                   | 10 ✓    | Explain how the study size was arrived at                                                                                                                                                                                                                                                                                                                                                                                                                                                                                                                                                                                                                                                        |
| Quantitative variables       | 11 ✓    | Explain how quantitative variables were handled in the analyses. If applicable, describe which groupings were chosen and why                                                                                                                                                                                                                                                                                                                                                                                                                                                                                                                                                                     |
| Statistical methods          | 12 ✓    | (a) Describe all statistical methods, including those used to control for confounding<br>(b) Describe any methods used to examine subgroups and interactions<br>(c) Explain how missing data were addressed<br>(d) <i>Cohort study</i> —If applicable, explain how loss to follow-up was addressed<br><i>Case-control study</i> —If applicable, explain how matching of cases and controls was addressed<br><i>Cross-sectional study</i> —If applicable, describe analytical methods taking account of sampling strategy<br>(e) Describe any sensitivity analyses                                                                                                                                |

Continued on next page

**Results**

|                  |     |                                                                                                                                                                                                                   |
|------------------|-----|-------------------------------------------------------------------------------------------------------------------------------------------------------------------------------------------------------------------|
| Participants     | 13* | (a) Report numbers of individuals at each stage of study—eg numbers potentially eligible, examined for eligibility, confirmed eligible, included in the study, completing follow-up, and analysed<br>✓            |
|                  |     | (b) Give reasons for non-participation at each stage                                                                                                                                                              |
|                  |     | (c) Consider use of a flow diagram                                                                                                                                                                                |
| Descriptive data | 14* | (a) Give characteristics of study participants (eg demographic, clinical, social) and information on exposures and potential confounders<br>✓                                                                     |
|                  |     | (b) Indicate number of participants with missing data for each variable of interest                                                                                                                               |
|                  |     | (c) <i>Cohort study</i> —Summarise follow-up time (eg, average and total amount)                                                                                                                                  |
| Outcome data     | 15* | <i>Cohort study</i> —Report numbers of outcome events or summary measures over time<br>✓                                                                                                                          |
|                  |     | <i>Case-control study</i> —Report numbers in each exposure category, or summary measures of exposure                                                                                                              |
|                  |     | <i>Cross-sectional study</i> —Report numbers of outcome events or summary measures                                                                                                                                |
| Main results     | 16  | (a) Give unadjusted estimates and, if applicable, confounder-adjusted estimates and their precision (eg, 95% confidence interval). Make clear which confounders were adjusted for and why they were included<br>✓ |
|                  |     | (b) Report category boundaries when continuous variables were categorized                                                                                                                                         |
|                  |     | (c) If relevant, consider translating estimates of relative risk into absolute risk for a meaningful time period                                                                                                  |
| Other analyses   | 17  | Report other analyses done—eg analyses of subgroups and interactions, and sensitivity analyses<br>✓                                                                                                               |

**Discussion**

|                  |    |                                                                                                                                                                              |
|------------------|----|------------------------------------------------------------------------------------------------------------------------------------------------------------------------------|
| Key results      | 18 | ✓ Summarise key results with reference to study objectives                                                                                                                   |
| Limitations      | 19 | ✓ Discuss limitations of the study, taking into account sources of potential bias or imprecision.<br>✓ Discuss both direction and magnitude of any potential bias            |
| Interpretation   | 20 | ✓ Give a cautious overall interpretation of results considering objectives, limitations, multiplicity of analyses, results from similar studies, and other relevant evidence |
| Generalisability | 21 | ✓ Discuss the generalisability (external validity) of the study results                                                                                                      |

**Other information**

|         |    |                                                                                                                                                                 |
|---------|----|-----------------------------------------------------------------------------------------------------------------------------------------------------------------|
| Funding | 22 | ✓ Give the source of funding and the role of the funders for the present study and, if applicable, for the original study on which the present article is based |
|---------|----|-----------------------------------------------------------------------------------------------------------------------------------------------------------------|

\*Give information separately for cases and controls in case-control studies and, if applicable, for exposed and unexposed groups in cohort and cross-sectional studies.

**Note:** An Explanation and Elaboration article discusses each checklist item and gives methodological background and published examples of transparent reporting. The STROBE checklist is best used in conjunction with this article (freely available on the Web sites of PLoS Medicine at <http://www.plosmedicine.org/>, Annals of Internal Medicine at <http://www.annals.org/>, and Epidemiology at <http://www.epidem.com/>). Information on the STROBE Initiative is available at [www.strobe-statement.org](http://www.strobe-statement.org).
